# 1 AIRBP: Accurate identification of RNA-binding proteins 2 using machine learning techniques

3 Avdesh Mishra<sup>1,¶</sup>, Reecha Khanal<sup>2,¶</sup> and Md Tamjidul Hoque<sup>2,\*</sup>

4 <sup>1</sup>Department of Electrical Engineering and Computer Science, Texas A&M University-Kingsville, Kingsville, TX,  
5 USA.

6 <sup>2</sup>Department of Computer Science, University of New Orleans, New Orleans, LA, USA.

7 \*To whom correspondence should be addressed.

8 Email: [thoque@uno.edu](mailto:thoque@uno.edu) (MTH)

9 <sup>¶</sup>These authors contributed equally to this work as first authors.

## 10 **Abstract**

11 **Motivation:** Identification of RNA-binding proteins (RBPs) that bind to ribonucleic acid molecules, is an  
12 important problem in Computational Biology and Bioinformatics. It becomes indispensable to identify  
13 RBPs as they play crucial roles in post-transcriptional control of RNAs and RNA metabolism as well as  
14 have diverse roles in various biological processes such as splicing, mRNA stabilization, mRNA  
15 localization, and translation, RNA synthesis, folding-unfolding, modification, processing, and degradation.  
16 The existing experimental techniques for identifying RBPs are time-consuming and expensive. Therefore,  
17 identifying RBPs directly from the sequence using computational methods can be useful to efficiently  
18 annotate RBPs and assist the experimental design. In this work, we present a method, called AIRBP, which  
19 is designed using an advanced machine learning technique, called stacking, to effectively predict RBPs by  
20 utilizing features extracted from evolutionary information, physiochemical properties, and disordered

21 properties. Moreover, our method, AIRBP is trained on the useful feature-subset identified by the  
22 evolutionary algorithm (EA).

23 **Results:** The results show that AIRBP attains Accuracy (ACC), F1-score, and MCC of 95.38%, 0.917, and  
24 0.885, respectively, based on the benchmark dataset, using 10-fold cross-validation (CV). Further  
25 evaluation of AIRBP on independent test set reveals that it achieves ACC, F1-score, and MCC of 93.04%,  
26 0.943, and 0.855, for Human test set; 91.60%, 0.942 and 0.789 for *S. cerevisiae* test set; and 91.67%, 0.953  
27 and 0.594 for *A. thaliana* test set, respectively. These results indicate that AIRBP outperforms the current  
28 state-of-the-art method. Therefore, the proposed top-performing AIRBP can be useful for accurate  
29 identification and annotation of RBPs directly from the sequence and help gain valuable insight to treat  
30 critical diseases.

31 **Availability:** Code-data is available here: [http://cs.uno.edu/~tamjid/Software/AIRBP/code\\_data.zip](http://cs.uno.edu/~tamjid/Software/AIRBP/code_data.zip)

## 32 Introduction

33 RNA Binding Proteins (RBPs) are proteins that bind to ribonucleic acid (RNA) molecules and form  
34 dynamic units, called ribonucleoprotein (RNP) complexes. These RBPs along with the RNP complexes,  
35 play a crucial role starting from the biogenesis process of RNA to its degradation ([Beckmann, et al., 2015](#)).  
36 Additionally, they contribute to several essential biological functions that include RNA transport, cellular  
37 localization, gene expression, expression of histone genes, post-transcriptional gene regulation, and  
38 regulation of translation and transcription control ([Glisovic, et al., 2008](#)). As an illustration, the newly  
39 formed messenger RNA, that carries necessary genetic information from DNA to ribosomes, associates  
40 with various RNA binding proteins (RBP) to form messenger ribonucleoprotein (mRNP) complexes ([Baltz,  
41 et al., 2012](#)). These mRNP complexes govern major elements of the metabolism and functions of mRNA.  
42 Similarly, the microRNPs (miRNPs), formed through association of the RBPs with microRNAs (miRNAs)  
43 controls the translation and stability of RNA itself ([Wurth, 2012](#)). The identification of RBPs along with  
44 their mRNA targets, is shown useful in cancer therapy ([Wurth, 2012](#)). Numerous other diseases have been  
45 linked to defective RBP expression and functions. Some of those diseases are neuropathies, muscular  
46 atrophies, and metabolic disorders ([Castello, et al., 2012](#)). All this information highlight the urgency of  
47 identifying the possible RBPs.

48 As of today, numerous studies have been performed, and various experimental and computational methods  
49 have been developed to identify and expand our knowledge of RBP. The initial steps towards identification  
50 and study of RBPs and RNP complexes date back to almost half a century ago where experimental methods  
51 such as purification of mRNPs from in vitro UV-irradiated polysomal fractions ([Greenberg, 1979](#)), from  
52 UV-irradiated intact cells ([Wagenmakers, et al., 1980](#)) and untreated cells ([Lindberg and Sundquist, 1974](#))  
53 revealed the association of a specific set of proteins with mRNA ([Baltz, et al., 2012](#)). Recently, cutting-  
54 edge experimental approaches are developed to recognize numerous RBPs, which include identification of  
55 860 RBPs in human HeLa cells ([Castello, et al., 2012](#)) using UV crosslinking methods, 797 RBPs in human  
56 embryonic kidney cell line ([Baltz, et al., 2012](#)) using photoreactive nucleotide-enhanced UV crosslinking

57 and oligo(dT) purification approach, 555 mRNA-binding proteins from mouse embryonic stem cells  
58 ([Kwon, et al., 2013](#)) using UV crosslinking, oligo(dT) and Mass Spectrometry and 120 RBPs from *S.*  
59 *cerevisiae* cells ([Mitchell, et al., 2013](#)) using UV crosslinking and purification methods. These experiments  
60 for identifying and analyzing of RBPs, have broadened our understanding of RBPs to a certain extent.  
61 Despite the great efforts and achievements, these experiments are expensive, time-consuming and labor-  
62 intensive ([Si, et al., 2015](#)). Moreover, the tremendous progress in genome sequencing has resulted in an  
63 unprecedented amount of genetic information and provided a plethora of protein sequences ([Wu, et al.,](#)  
64 [2006](#)), which outpace the tasks of annotating them and elucidating their functions. Thus, it becomes urgent  
65 to have faster and more accurate computational approaches to build an RBP repository and RNA-RBP  
66 interaction network maps.

67 In the recent past, several attempts have been made in identifying RNA-binding proteins and many effective  
68 computational prediction methods have been developed, which can be divided into two broad categories:  
69 *i)* templated based; and *ii)* machine learning-based. Template-based methods extract significant structural  
70 or sequence similarity between the query and a template known to bind RNA to assess the RNA-binding  
71 preference of the target sequence ([Yang, et al., 2012](#); [Zhao, et al., 2011](#); [Zhao, et al., 2011](#)). Unlike template-  
72 based methods, in machine learning methods, the predictive model is created to predict by finding a pattern  
73 in the input feature space ([Kumar, et al., 2011](#); [Paz, et al., 2016](#); [Shazman and Mandel-Gutfreund, 2008](#)).  
74 The machine learning approaches vary in the features employed and the classification algorithm used.

75 Zhao *et al.* proposed two template-based approaches for predicting RBPs, of which, SPOT-stru ([Zhao, et](#)  
76 [al., 2011](#)) is a structure-based approach, and SPOT-seq ([Zhao, et al., 2011](#)) is a sequence-based approach.  
77 In SPOT-stru, the relative structural similarity in the form of Z-score and a statistical energy function  
78 DFIRE is used to predict RBPs. The results indicate that SPOT-stru achieved the MCC of 0.57 on the  
79 benchmark data of 212 RNA-binding domains and 6761 non-RNA binding domains. On the other hand, in  
80 SPOT-seq, the fold recognition between the target sequence and template structures using the defined

81 sequence-structure matching score is used to predict RBPs. As shown, SPOT-seq achieved the MCC of  
82 0.62 on the benchmark data of 215 RBP chains and 5765 non-binding protein chains.

83 The machine learning-based approach for the prediction of RNA-binding proteins involves two crucial  
84 steps: *i*) extraction of relevant features, and *ii*) selection of an appropriate classification algorithm.

85 Furthermore, depending on the feature extraction mechanism, the existing predictive method can be  
86 segmented into two different categories: *i*) extraction of relevant features from the structure of protein ([Paz,](#)

87 [et al., 2016](#); [Shazman and Mandel-Gutfreund, 2008](#)); and *ii*) extraction of relevant features from protein  
88 sequence ([Kumar, et al., 2011](#); [Ma, et al., 2015](#); [Ma, et al., 2015](#); [Zhang and Liu, 2017](#)). BindUp ([Paz, et](#)

89 [al., 2016](#)) available as a web server, is one of the recent structure-based methods that extract electrostatic  
90 features and other properties from the structure of the protein and uses SVM classifier for RBPs prediction.

91 As reported, BindUp attains sensitivity of 0.71 and specificity of 0.96 on an independent test set of 323  
92 structures of RNA binding proteins and a control set of an equal number extracted from Protein Data Bank

93 (PDB). Towards a sequence-based approach, Ma *et al.* ([Ma, et al., 2015](#); [Ma, et al., 2015](#)) recently proposed  
94 two different methods, which differ in the features used to train the random forest model for predicting. In

95 ([Ma, et al., 2015](#)), the authors incorporated features of evolutionary information combined with  
96 physicochemical features (EIPP) and amino acid composition feature to develop the random forest

97 predictor. Besides, in ([Ma, et al., 2015](#)), the authors employed features such as a conjoint triad, binding  
98 propensity, non-binding propensity, and EIPP to establish random forest-based predictor with the minimum

99 redundancy maximum relevance (mRMR) method, followed by incremental feature selection (IFS). As  
100 reported, their method achieved an accuracy of 0.8662 and MCC of 0.737. Zhang and Liu ([Zhang and Liu,](#)

101 [2017](#)) proposed a new sequence-based approach, namely RBPPred which, integrates the physiochemical  
102 properties with the evolutionary information extracted from Position Specific Scoring Matrix (PSSM)

103 profile and utilizes SVM to predict RBPs. As shown, RBPPred correctly predicted 83% of 2780 RBPs and  
104 96% of 7093 non-RBPs with MCC of 0.808 using the 10-fold cross-validation (CV) approach. Despite

105 significant progress, most of the approaches for RBPs prediction developed in the past are limited in

106 explaining how protein-RNA interactions occur. Thus, it is essential to identify new features, effective  
107 encoding technique and advanced machine learning techniques that can help further improve the accuracy  
108 of RBPs predictor and ultimately improve our understanding of RNA-protein interactions and their  
109 functions.

110 In this work, we explore different sequence-based features, encoding techniques, and machine learning  
111 approaches to further improve the prediction accuracy of RNA-binding proteins and our understanding of  
112 the binding mechanism of RNA-protein interaction. We propose a method, AIRBP, which utilizes features:  
113 Evolutionary Information (EI), Physiochemical Properties (PP), and Disordered Properties (DP). It uses  
114 four different types of feature encoding technique: Composition, Transition and Distribution (C-T-D)  
115 ([Zhang and Liu, 2017](#)), Conjoint Triad (CT) ([Wang, et al., 2013](#); [Zhang and Liu, 2017](#)), PSSM Distance  
116 Transformation (PSSM-DT) ([Mishra, et al., 2018](#); [Xu, et al., 2015](#)) and Residue-wise Contact Energy  
117 Matrix Transformation (RCEM-T) ([Mishra, et al., 2018](#)). Furthermore, AIRBP utilizes an ensemble  
118 machine learning framework, known as stacking ([Wolpert, 1992](#)) to predict RBPs from protein sequence  
119 only. AIRBP offers a significant improvement in the prediction of RBPs based on the benchmark and  
120 independent test datasets when compared to the existing start-of-the-art predictors. Therefore, our predictor  
121 can be trusted and used by the research community to guide further the experiments related to RNA-protein  
122 interactions and their functions. Further, our study highlights the importance of adding features that account  
123 for intrinsically disordered regions in predicting RNA-binding proteins. Our research supports the claim  
124 that RNA-binding proteins bind with RNA not only through classical structured RNA-binding domains but  
125 also through intrinsically disordered regions. Additionally, our study suggests that the research community  
126 would be benefited by considering intrinsically disordered regions in protein that induce binding with RNA,  
127 in their experimental studies. We believe that the superior performance of AIRBP will motivate the  
128 researchers to use it to identify RNA-binding proteins from sequence information. Moreover, the proposed  
129 stacking based machine learning technique, encoding techniques and features discussed in this work could  
130 be applied to tackle other relevant biological problems.

## 131 **Materials and methods**

132 In this section, we describe the approach for benchmark and independent test data preparation, feature  
133 extraction and encoding, performance evaluation metrics, and finally, the path we took to establish the  
134 machine learning framework for RBPs prediction.

### 135 **Dataset**

#### 136 **Benchmark dataset**

137 For this work, we collected the updated version of the benchmark dataset first proposed by ([Liu; Zhang and](#)  
138 [Liu, 2017](#)) from web link <http://rnabinding.com/RBPPred.html>. The updated benchmark dataset was  
139 created by the authors ([Zhang and Liu, 2017](#)) from the original benchmark dataset by removing 16 proteins  
140 that had RNAs in their crystal structure from the negative set. Therefore, the updated benchmark dataset,  
141 we collected, consists of 7077 non-RBPs (16 proteins removed from the original benchmark dataset which  
142 contained 7093 non-RBPs) and 2780 RBPs (same as the original benchmark dataset). Next, we found that  
143 13 out of 2780 and 90 out of 7077 protein sequences in RBPs and non-RBPs set respectively, contained  
144 non-standard amino acids (amino acids other than the 20 standard amino acids). These sequences containing  
145 non-standard amino acids were removed from further consideration as the physiochemical properties of  
146 non-standard amino acids could not be obtained. Finally, the benchmark dataset which contains 2767 RBPs  
147 and 6987 non-RBPs was collected and used for validation and model creation of AIRBP.

#### 148 **Independent test set**

149 For this work, we collected the updated version of the benchmark dataset first proposed by ([Liu; Zhang and](#)  
150 [Liu, 2017](#)) from web link <http://rnabinding.com/RBPPred.html>. This dataset consists of independent test  
151 sets for 3 species, human, *Saccharomyces cerevisiae* (*S. cerevisiae*) and *Arabidopsis thaliana* (*A. thaliana*).  
152 The test set was created by the authors ([Zhang and Liu, 2017](#)) from the original independent test set by  
153 removing 9 proteins from the human set and 7 proteins from *S. cerevisiae* set that had RNAs in their crystal

154 structure from the negative set, respectively. The updated independent test sets contained a total of 967  
155 RBPs and 588 non-RBPs for human, 354 RBPs and 135 non-RBPs for *S. cerevisiae* and 456 RBPs and 37  
156 non-RBPs for *A. thaliana*. Next, we removed the protein sequences containing non-standard amino acid  
157 from each of these independent datasets and finally obtained 967 RBPs and 584 non-RBPs for human, 354  
158 RBPs and 134 non-RBPs for *S. cerevisiae* and 456 RBPs and 36 non-RBPs for *A. thaliana*.

## 159 **Feature extraction**

160 To create an effective RBPs predictor from sequence alone, the feature vector for each protein sequence  
161 was derived from the PSSM profile, Physicochemical Properties (PP), Residue-wise Contact Energy Matrix  
162 (RCEM) and Molecular Recognition Features (MoRFs). A total of 10 different properties was encoded with  
163 a vector of 2603 dimensions to represent a protein sequence, as shown in Fig 1. Out of 10, five distinct  
164 properties hydrophobicity, polarity, normalized van der Waals volume, polarizability and predicted  
165 secondary structure that belongs to PP group were each encoded via 21 dimension vector utilizing the C-  
166 T-D encoding technique ([Dubchak, et al., 1995](#); [Zhang and Liu, 2017](#)). Moreover, the remaining five  
167 properties solvent accessibility, charge and polarity of the side chain, MoRFs, RCEM, and PSSM profile  
168 were encoded via 13, 64, 1, 20 and 2400 dimensional vectors, respectively. Here, PSSM belongs to the EI  
169 group and MoRFs and RCEM belong to the DP group. The properties solvent accessibility, charge and  
170 polarity of the side chain, RCEM and PSSM profile were encoded utilizing C-T-D, CT ([Wang, et al., 2013](#);  
171 [Zhang and Liu, 2017](#)), RCEM transformation ([Mishra, et al., 2018](#)) and PSSM-DT transformation  
172 techniques ([Mishra, et al., 2018](#); [Xu, et al., 2015](#)), respectively. Each of the 10 properties along with their  
173 encoding mechanism is described next in detail.

## 174 **Features extracted from physicochemical properties**

175 In this section we describe various feature extraction techniques, we utilized to obtain a fixed dimensional  
176 feature vector from the physicochemical properties which include hydrophobicity, polarity, normalized van



177 der Waals volume, polarizability, predicted secondary structure, solvent accessibility and charge and  
 178 polarity of the side chain to encode protein sequence.

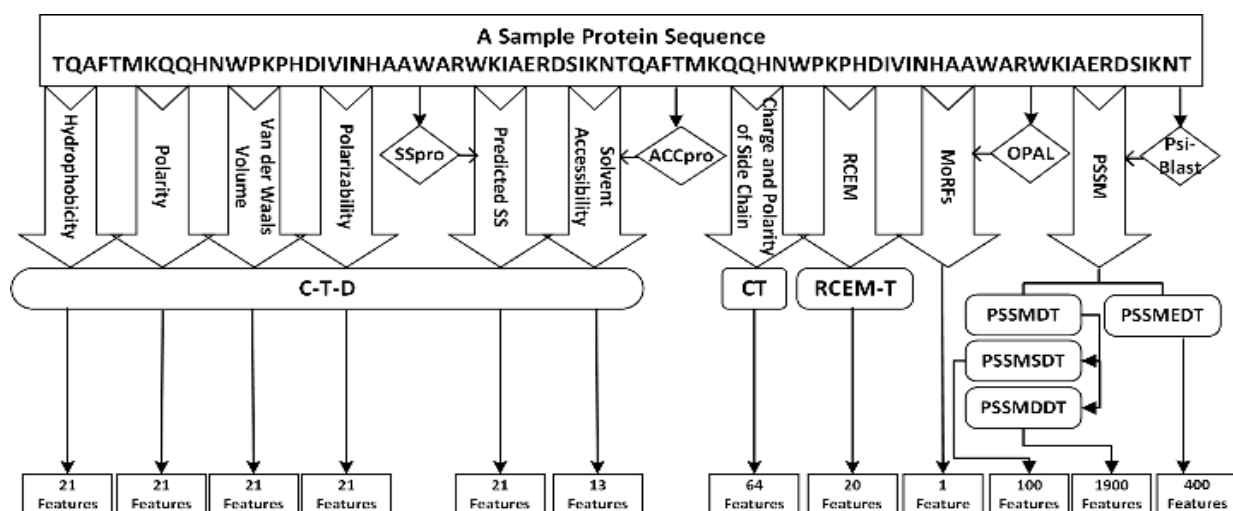

179 **Fig 1. Illustration of encoding the protein sequence into a feature vector of 2603 features utilizing various feature encoding**  
 180 **technique.** Here, the predicted SS and surface accessibility was obtained from SSpro and ACCpro program ([Magnan and Baldi,](#)  
 181 [2014](#)). Likewise, the MoRFs scores were predicted using the OPAL program ([Sharma, et al., 2018](#)) and the PSSM scores were  
 182 obtained using the PSI-BLAST program ([Altschul, et al., 1990](#))

### 183 **Composition, Transition and Distribution (C-T-D) transformation features**

184 In this section, the C-T-D transformation method aims to describe the distribution patterns of amino acid  
 185 properties. This method to compute distribution patterns of amino acid properties were first suggested by  
 186 ([Dubchak, et al., 1995](#)) for protein fold class prediction. In our implementation, we used C-T-D  
 187 transformation to encode the properties including hydrophobicity, polarity, normalized van der Waals  
 188 volume, polarizability, predicted the secondary structure and solvent accessibility. As the name suggests,  
 189 this transformation technique focuses on three different components: composition of a particular amino  
 190 acid in the sequence, transition of one amino acid to other as we go linearly through the sequence, and  
 191 distribution referring to how one amino acid group is distributed throughout the protein sequence ([Han, et](#)  
 192 [al., 2004](#); [Zhang and Liu, 2017](#)). To create a consistent number of features for proteins with different  
 193 sequence length, 20 standard amino acids are divided into 3 groups ([Dubchak, et al., 1999](#)) based on their

194 hydrophobicity, normalized van der Waals volume, polarity, and polarizability. Fig 2 illustrates the C-T-D  
 195 transformation technique while the 20 standard amino acids are divided into 2 groups which, generates a  
 196 feature vector of 13 dimensions. Following the transformation, the technique is shown in Fig 2 with an  
 197 exception that the 20 standard amino acids are divided into 3 groups, we obtain a feature vector of 21  
 198 dimensions for the physiochemical properties such as hydrophobicity, normalized van der Waals volume,  
 199 polarity, and polarizability.

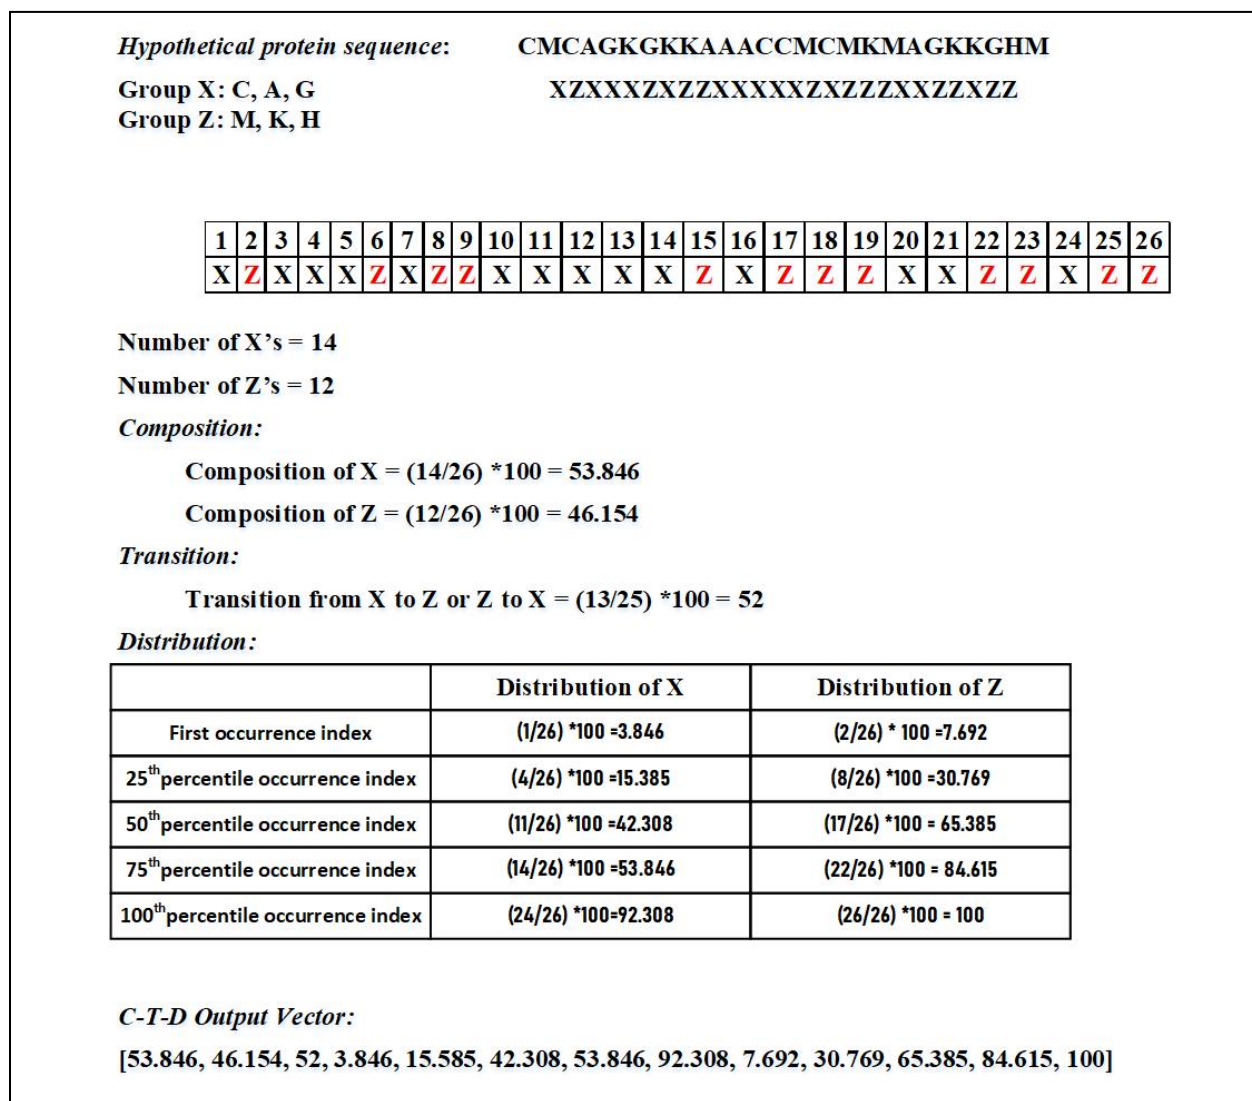

200 **Fig 2. Illustration of the C-T-D transformation technique.** While the 20 standard amino acids are divided into 2 groups (e.g., X  
 201 and Z). First, the group index (X or Z) of every amino acid in the protein sequence is extracted and consequently, a vector of 13  
 202 dimensions is obtained through composition, transition, and distribution.

203 Furthermore, to encode the predicted secondary structure and solvent accessibility as features, we first used  
204 the SSpro and ACCpro program ([Magnan and Baldi, 2014](#)) to predict secondary structure in the form of  
205 ‘H’ (helix), ‘E’ (strand) and ‘C’ (other than helix and strand) and solvent accessibility in the form of ‘e’  
206 (exposed residues) and ‘-’ (buried residues), respectively. The choice of SSpro and ACCpro was made to  
207 extract predicted secondary structure and solvent accessibility because of its superior performance and  
208 remarkable speed. As reported, SSpro and ACCpro ([Magnan and Baldi, 2014](#)) achieved an accuracy of  
209 92.9% and 90% for secondary structure prediction and relative solvent accessibility prediction, respectively.  
210 Using the transformation technique described above, we obtained a feature vector of 21 dimensional and  
211 13 dimensions for predicted secondary structure and solvent accessibility, respectively.

### 212 **Conjoint Triad (CT) transformation features**

213 While the 20 standard amino acids are divided into 4 groups (Group A, B, C, and D representing acidic, basic, polar  
214 and non-polar, respectively). Shen *et al.* first proposed the CT transformation technique for protein-protein  
215 interaction prediction ([Shen, et al., 2007](#)), which was successfully applied for protein-RNA interaction  
216 prediction in the past ([Wang, et al., 2013](#); [Zhang and Liu, 2017](#)). In our implementation, we adopted the  
217 CT transformation technique to encode the protein sequence based on the charge and polarity of the side  
218 chain of the amino acids in a protein. First, the 20 standard amino acids are divided into 4 groups: *i*) acidic  
219 (contain residues D and E); *ii*) basic (contain residues H, R and K); *iii*) polar (contain residues C, G, N, Q,  
220 S, T, and Y); and *iv*) non-polar (contain residues A, F, I, L, M, P, V, and W) according to their charge and  
221 polarity of the side chain. Then, the protein sequence is converted into a sequence of group types where  
222 each element in the sequence represents a group type of the corresponding amino acid in the protein  
223 sequence. Next, a triad of three contiguous amino acids is considered as a single unit. Accordingly, all the  
224 triads can be classified into  $4 \times 4 \times 4 = 64$  classes. Finally, a sliding window of a triad is passed through a  
225 sequence of group types and the frequency of occurrences of each type of triad is counted. Through this  
226 process, we obtain a feature vector of 64 dimensions for charge and polarity of side chains of amino acids

227 in a protein. Fig 3 provides an illustration of the CT transformation technique we used to extract features  
 228 from protein sequence based on charge and polarity of side chains.

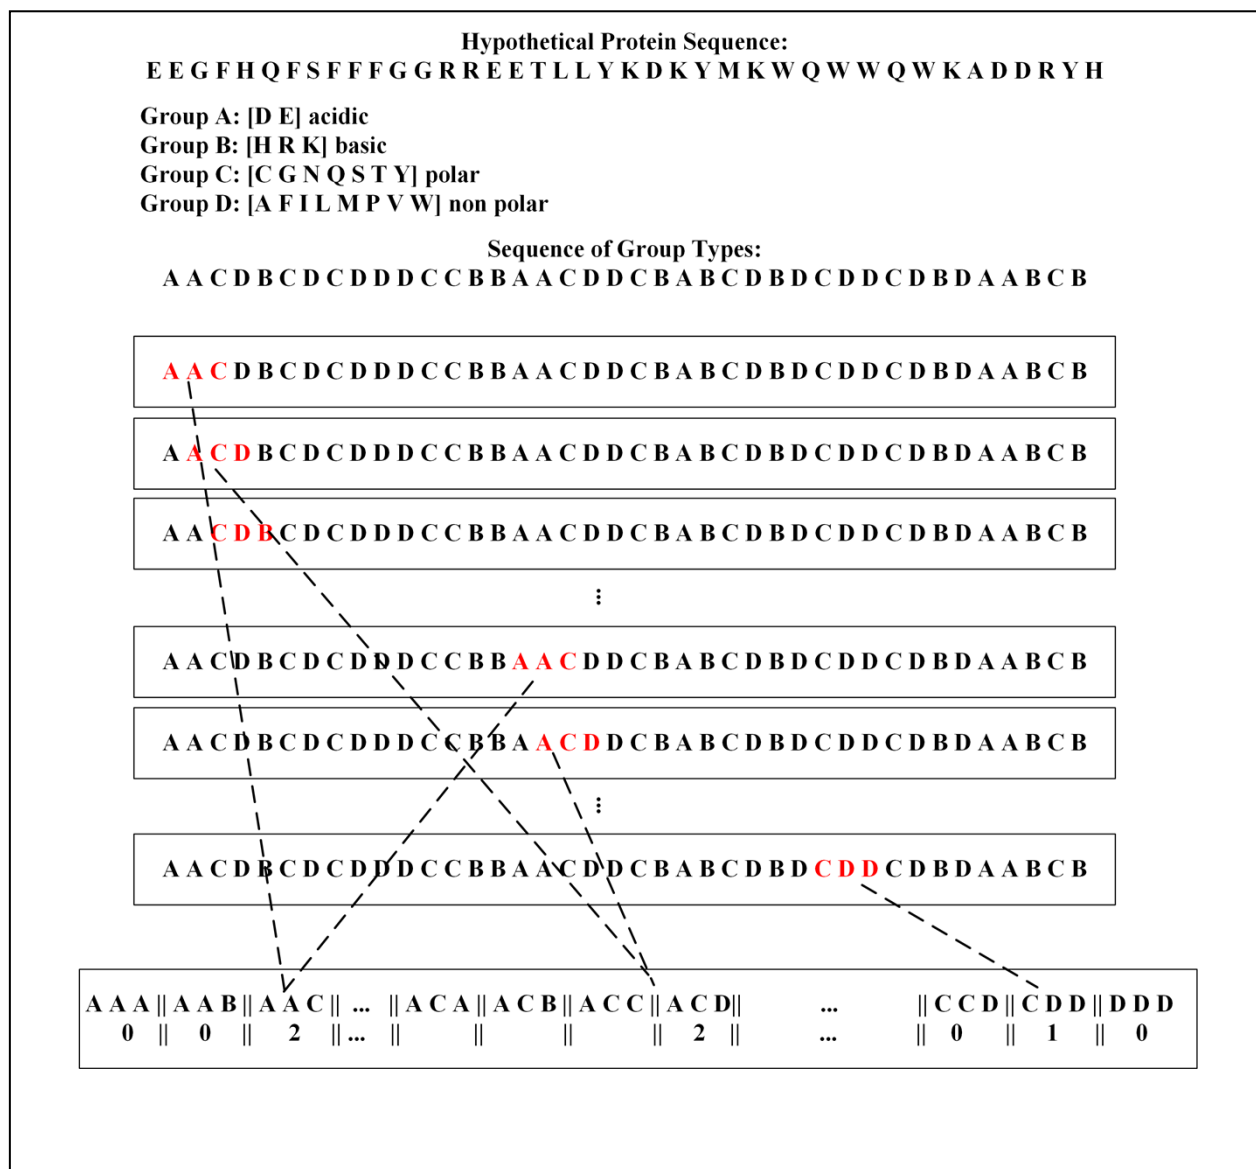

229 **Fig 3. Illustration of Conjoint Triad transformation technique.**

230 **Features extracted from evolutionary information**

231 In this section, we describe various feature extraction techniques utilized to obtain a fixed dimensional  
 232 feature vector from the evolutionary information, called PSSM profile to encode protein sequence.

233 Evolutionary information is one of the most critical information useful for solving various biological  
234 problems and has been widely used in many research work ([Iqbal, et al., 2015](#); [Kumar, et al., 2007](#); [Kumar,](#)  
235 [et al., 2008](#); [Kumar, et al., 2011](#); [Mishra, et al., 2018](#); [Zhang and Liu, 2017](#)). In this work, the evolutionary  
236 information in the form of the PSSM profile is directly obtained from the protein sequence and later  
237 transformed into a fixed dimensional vector. PSSM captures the conservation pattern in multiple alignments  
238 and preserves it as a matrix for each position in the alignment. The high score in the PSSM matrix indicates  
239 more conserved positions and the lower score indicates less conserved positions ([Mishra, et al., 2018](#)). For  
240 this study, we generated the PSSM profile for every protein sequence by executing three iterations of PSI-  
241 BLAST against NCBI's non-redundant database ([Altschul, et al., 1990](#)). The evolutionary information in  
242 the PSSM profile is represented as a matrix of  $L*20$  dimensions, where  $L$  is the length of the protein  
243 sequence. A particular element  $M_{i,j}$  of the PSSM matrix represents the occurrence probability of the amino  
244 acid  $i$  at position  $j$  of a protein sequence.

#### 245 **PSSM-Distance transformation (PSSM-DT) features**

246 We use two types of distance transformation techniques ([Mishra, et al., 2018](#); [Xu, et al., 2015](#)): *i*) the PSSM  
247 distance transformation for same pairs of amino acids (PSSM-SDT); and *ii*) the PSSM distance  
248 transformation for different pairs of amino acids (PSSM-DDT), together known as PSSM-DT to extract  
249 fixed dimensional feature vectors of size 100 and 1900, respectively.

250 Utilizing PSSM-SDT, we compute the occurrence probabilities for the pairs of the same amino acids  
251 separated by a distance  $D$  along the sequence, which can be represented as:

$$PSSM - SDT(j, D) = \sum_{i=1}^{L-D} M_{i,j} * M_{i+D,j} / (L - D) \quad (1)$$

252 where  $j$  represents one type of the amino acid,  $L$  represents the length of the sequence,  $M_{i,j}$  represents the  
253 PSSM score of amino acid  $j$  at position  $i$ , and  $M_{i+D,j}$  represents the PSSM score of amino acid  $j$  at position

254  $i+D$ . Through this approach,  $20 \times K$  number of features were generated where  $K$  is the maximum range of  
255  $D$  ( $D = 1, 2, \dots, K$ ).

256 Likewise, utilizing PSSM-DDT, we compute the occurrence probabilities for pairs of different amino acids  
257 separated by a distance  $D$  along the sequence, which can be represented as:

$$PSSM - DDT(i_1, i_2, D) = \sum_{j=1}^{L-D} M_{j, i_1} * M_{j+D, i_2} / (L - D) \quad (2)$$

258 where,  $i_1$  and  $i_2$  represent two different types of amino acids. The total number of features obtained by  
259 PSSM-DDT is  $380 \times K$ . Here, we consider  $K = 5$ . Therefore a total of 100 features was obtained by PSSM-  
260 SDT and PSSM-DDT transformation techniques obtained a total of 1900 features.

### 261 **Evolutionary distance transformation (EDT) features**

262 Unlike PSSM-DT, the EDT approximately measures the non-co-occurrence probability of two amino acids  
263 separated by a specific distance  $d$  in a protein sequence from the PSSM profile ([Mishra, et al., 2018](#); [Zhang,](#)  
264 [et al., 2014](#)). The EDT is calculated from the PSSM profile as:

$$f(R_x, R_y) = \sum_{d=1}^D \frac{1}{L-d} \sum_{i=1}^{L-d} (M_{i,x} - M_{i+d,y})^2 \quad (3)$$

265 where  $d$  is the distance separating two amino acids,  $D$  is the maximum value of  $d$ ,  $M_{i,x}$  and  $M_{i+d,y}$  are the  
266 elements in the PSSM profile, and  $R_x$  and  $R_y$  represent any of the 20 standard amino acids in the protein  
267 sequence. Here, the value of  $D = L_{min} - 1$  where  $L_{min}$  is the length of the shortest protein sequence in the  
268 benchmark dataset. Using EDT, we obtain a feature vector of dimension 400.

### 269 **Features extracted from disordered properties**

270 In this section, we describe a feature extraction technique utilized to obtain a fixed dimensional feature  
271 vector from the residue-wise contact energy matrix to encode protein sequence.

272 RBPs are found to bind with RNA not only through classical structured RNA-binding domains but also  
273 through intrinsically disordered regions (IDRs) ([Calabretta and Richard, 2015](#)). For example,  
274 approximately 20% of the identified mammalian RBPs (~170 proteins) were found to be disordered by over  
275 80% ([Järvelin, et al., 2016](#)). The energy contribution of a large number of inter and intra-residual  
276 interactions in intrinsically disordered proteins (IDPs) cannot be approximated by the energy functions  
277 extracted from known structures ([Hoque, et al., 2016](#); [Iqbal, et al., 2015](#); [Mishra and Hoque, 2017](#); [Mishra,](#)  
278 [et al., 2016](#); [Zhou and Skolnick, 2011](#)) as IDPs lack a defined and ordered 3D structure ([Babu, et al., 2011](#)).  
279 Therefore, to inherently incorporate important information regarding the IDRs and amino acid interactions,  
280 we employed the predicted residue-wise contact energies ([Dosztányi, et al., 2005](#)) and molecular  
281 recognition features (MoRFs) ([Sharma, et al., 2018](#)), to encode the protein sequence.

## 282 **Residue-wise contact energy matrix transformation (RCEM-T) features**

283 We adopted the predicted residue-wise contact energy matrix (RCEM) derived in ([Dosztányi, et al., 2005](#)),  
284 by the least square fitting of 674 proteins primary sequence with the contact energies derived from the  
285 tertiary structure of 785 proteins. As shown in Table 1, the RCEM is a  $20 \times 20$  dimensional matrix that  
286 contains residue-wise contact energy for 20 standard amino acids. For a protein sequence of length  $L$ , an  $L$   
287  $\times 20$  dimensional matrix  $M$  is obtained which holds a 20-dimensional vector for each amino acid in a protein  
288 sequence. The resulting matrix  $M$  is then encoded into a feature vector of 20 dimensional by computing the  
289 column-wise sum as:

$$f(A_j) = \sum_{i=1}^L m_{i,j} \quad (j = 1, 2, \dots, 20) \quad (4)$$

290 where  $m_{i,j}$  is the element of matrix  $M$ ,  $i$  is the amino acid index in a sequence, and  $j$  represents 20 standard  
291 amino acid types. The final feature vector,  $RCEM - T = [v_1, v_2, \dots, v_{20}]$  is obtained by dividing each  
292 element in  $RCEM - T$  by the sum of all the elements in the same vector. Considering  $V_s$  as the sum of all the  
293 elements in the RCEM-T vector, each component of the final  $RCEM - T$  vector can be represented as:

$$RCEMT(v_i) = \frac{v_i}{V_s} \quad (5)$$

294 **Table 1. RCEM table used to obtain RCEM-T features.**

|   | A     | C      | D     | E     | F      | G     | H     | I     | K     | L     | M     | N     | P     | Q     | R     | S     | T     | V     | W      | Y          |
|---|-------|--------|-------|-------|--------|-------|-------|-------|-------|-------|-------|-------|-------|-------|-------|-------|-------|-------|--------|------------|
| A | -1.65 | -2.83  | 1.16  | 1.8   | -3.73  | -0.41 | 1.9   | -3.69 | 0.49  | -3.01 | -2.08 | 0.66  | 1.54  | 1.2   | 0.98  | -0.08 | 0.46  | -2.31 | 0.32   | -4.62      |
| C | -2.83 | -39.58 | -0.82 | -0.53 | -3.07  | -2.96 | -4.98 | 0.34  | -1.38 | -2.15 | 1.43  | -4.18 | -2.13 | -2.91 | -0.41 | -2.33 | -1.84 | -0.16 | 4.26   | -4.46      |
| D | 1.16  | -0.82  | 0.84  | 1.97  | -0.92  | 0.88  | -1.07 | 0.68  | -1.93 | 0.23  | 0.61  | 0.32  | 3.31  | 2.67  | -2.02 | 0.91  | -0.65 | 0.94  | -0.71  | 0.90       |
| E | 1.8   | -0.53  | 1.97  | 1.45  | 0.94   | 1.31  | 0.61  | 1.3   | -2.51 | 1.14  | 2.53  | 0.2   | 1.44  | 0.1   | -3.13 | 0.81  | 1.54  | 0.12  | -1.07  | 1.29       |
| F | -3.73 | -3.07  | -0.92 | 0.94  | -11.25 | 0.35  | -3.57 | -5.88 | -0.82 | -8.59 | -5.34 | 0.73  | 0.32  | 0.77  | -0.4  | -2.22 | 0.11  | -7.05 | -7.09  | -8.80      |
| G | -0.41 | -2.96  | 0.88  | 1.31  | 0.35   | -0.2  | 1.09  | -0.65 | -0.16 | -0.55 | -0.52 | -0.32 | 2.25  | 1.11  | 0.84  | 0.71  | 0.59  | -0.38 | 1.69   | -1.90      |
| H | 1.9   | -4.98  | -1.07 | 0.61  | -3.57  | 1.09  | 1.97  | -0.71 | 2.89  | -0.86 | -0.75 | 1.84  | 0.35  | 2.64  | 2.05  | 0.82  | -0.01 | 0.27  | -7.58  | -3.20      |
| I | -3.69 | 0.34   | 0.68  | 1.3   | -5.88  | -0.65 | -0.71 | -6.74 | -0.01 | -9.01 | -3.62 | -0.07 | 0.12  | -0.18 | 0.19  | -0.15 | 0.63  | -6.54 | -3.78  | -5.26      |
| K | 0.49  | -1.38  | -1.93 | -2.51 | -0.82  | -0.16 | 2.89  | -0.01 | 1.24  | 0.49  | 1.61  | 1.12  | 0.51  | 0.43  | 2.34  | 0.19  | -1.11 | 0.19  | 0.02   | -1.19      |
| L | -3.01 | -2.15  | 0.23  | 1.14  | -8.59  | -0.55 | -0.86 | -9.01 | 0.49  | -6.37 | -2.88 | 0.97  | 1.81  | -0.58 | -0.6  | -0.41 | 0.72  | -5.43 | -8.31  | -4.90      |
| M | -2.08 | 1.43   | 0.61  | 2.53  | -5.34  | -0.52 | -0.75 | -3.62 | 1.61  | -2.88 | -6.49 | 0.21  | 0.75  | 1.9   | 2.09  | 1.39  | 0.63  | -2.59 | -6.88  | -9.73      |
| N | 0.66  | -4.18  | 0.32  | 0.2   | 0.73   | -0.32 | 1.84  | -0.07 | 1.12  | 0.97  | 0.21  | 0.61  | 1.15  | 1.28  | 1.08  | 0.29  | 0.46  | 0.93  | -0.74  | 0.93       |
| P | 1.54  | -2.13  | 3.31  | 1.44  | 0.32   | 2.25  | 0.35  | 0.12  | 0.51  | 1.81  | 0.75  | 1.15  | -0.42 | 2.97  | 1.06  | 1.12  | 1.65  | 0.38  | -2.06  | -2.09      |
| Q | 1.2   | -2.91  | 2.67  | 0.1   | 0.77   | 1.11  | 2.64  | -0.18 | 0.43  | -0.58 | 1.9   | 1.28  | 2.97  | -1.54 | 0.91  | 0.85  | -0.07 | -1.91 | -0.76  | 0.01       |
| R | 0.98  | -0.41  | -2.02 | -3.13 | -0.4   | 0.84  | 2.05  | 0.19  | 2.34  | -0.6  | 2.09  | 1.08  | 1.06  | 0.91  | 0.21  | 0.95  | 0.98  | 0.08  | -5.89  | 0.36       |
| S | -0.08 | -2.33  | 0.91  | 0.81  | -2.22  | 0.71  | 0.82  | -0.15 | 0.19  | -0.41 | 1.39  | 0.29  | 1.12  | 0.85  | 0.95  | -0.48 | -0.06 | 0.13  | -3.03  | -0.82      |
| T | 0.46  | -1.84  | -0.65 | 1.54  | 0.11   | 0.59  | -0.01 | 0.63  | -1.11 | 0.72  | 0.63  | 0.46  | 1.65  | -0.07 | 0.98  | -0.06 | -0.96 | 1.14  | -0.65  | -0.37      |
| V | -2.31 | -0.16  | 0.94  | 0.12  | -7.05  | -0.38 | 0.27  | -6.54 | 0.19  | -5.43 | -2.59 | 0.93  | 0.38  | -1.91 | 0.08  | 0.13  | 1.14  | -4.82 | -2.13  | -3.59      |
| W | 0.32  | 4.26   | -0.71 | -1.07 | -7.09  | 1.69  | -7.58 | -3.78 | 0.02  | -8.31 | -6.88 | -0.74 | -2.06 | -0.76 | -5.89 | -3.03 | -0.65 | -2.13 | -1.73  | -1<br>2.39 |
| Y | -4.62 | -4.46  | 0.9   | 1.29  | -8.8   | -1.9  | -3.2  | -5.26 | -1.19 | -4.9  | -9.73 | 0.93  | -2.09 | 0.01  | 0.36  | -0.82 | -0.37 | -3.59 | -12.39 | -2.68      |



## 295 **Molecular recognition features (MoRFs)**

296 MoRFs, also sometimes known as molecular recognition elements (MoREs), are disordered regions in a  
297 protein that exhibit various molecular recognition and binding functions ([Vacic, et al., 2007](#)). Post-  
298 translational modifications (PTMs) can induce disorder to order transitions of IDPs upon binding with their  
299 binding partners which could be either RNA, DNA, proteins, lipids, carbohydrates or other small molecules  
300 ([Bah and Forman-Kay, 2016](#); [Lina, et al., 2017](#)). MoRFs play a vital role in various biological functions of  
301 IDPs located within long disordered protein sequences ([Mohan, et al., 2006](#); [Sharma, et al., 2018](#); [Sharma,](#)  
302 [et al., 2018](#); [Sharma, et al., 2018](#)). Additionally, Mohan *et al.* suggest that functionally significant residual  
303 structures exist in MoRF regions prior to the actual binding ([Mohan, et al., 2006](#)). These residual structures  
304 could, therefore, be useful in the prediction of binding between proteins and RNA. Here, to capture the  
305 functional properties of IDRs that may bind to RNAs, we employ a single predicted MoRFs score as a  
306 feature. To obtain a single predicted MoRFs score, first, the residue-wise predicted MoRFs scores are  
307 obtained from the OPAL program ([Sharma, et al., 2018](#)). Then, a single predicted MoRFs score is computed  
308 by taking a ratio of the sum of the residue-wise MoRFs score and the length of the protein sequence.

## 309 **Performance evaluation**

310 To evaluate the performance of AIRBP, we adopted a widely used 10-fold CV and the independent testing  
311 approach. In the process of 10-fold CV, the dataset is segmented into 10 parts, which are each of about the  
312 same size. When one fold is kept aside for testing, the remaining 9 folds are used to train the classifier. This  
313 process of training and test is repeated until each fold has been kept aside once for testing and consequently,  
314 the test accuracies of each fold are combined to compute the average ([Hastie, et al., 2009](#)). Unlike a 10-fold  
315 CV, in independent testing, the classifier is trained with the benchmark dataset and consequently tested  
316 using the independent test dataset. While independent testing, it is ensured that none of the samples in the  
317 independent test set are present in the benchmark dataset. We used several performance evaluation metrics  
318 listed in Table 2 as well as ROC and AUC to test the performance of the proposed method as well as to

319 compare it with the existing approaches. AUC is the area under the receiver operating characteristics (ROC)  
 320 curve which is used to evaluate how well a predictor separates two classes of information (RNA-binding  
 321 and non-binding protein).

322 **Table 2. Name and definition of the evaluation metric.**

| Name of Metric                             | Definition                                                           |
|--------------------------------------------|----------------------------------------------------------------------|
| True Positive (TP)                         | Correctly predicted RNA-binding proteins                             |
| True Negative (TN)                         | Correctly predicted non RNA-binding proteins                         |
| False Positive (FP)                        | Incorrectly predicted RNA-binding proteins                           |
| False Negative (FN)                        | Incorrectly predicted non RNA-binding proteins                       |
| Recall/Sensitivity/True Positive Rate (SN) | $\frac{TP}{TP + FN}$                                                 |
| Specificity/True Negative Rate (SP)        | $\frac{TN}{TN + FP}$                                                 |
| Fall Out Rate /False Positive Rate (FPR)   | $\frac{FP}{FP + TN}$                                                 |
| Miss Rate/False Negative Rate (FNR)        | $\frac{FN}{FN + TP}$                                                 |
| Accuracy (ACC)                             | $\frac{TP + TN}{FP + TP + TN + FN}$                                  |
| Balanced Accuracy (BACC)                   | $\frac{1}{2} \left( \frac{TP}{TP + FN} + \frac{TN}{TN + FP} \right)$ |
| Precision (PR)                             | $\frac{TP}{TP + FP}$                                                 |

F1-score (Harmonic mean of precision and recall) 
$$\frac{2TP}{2TP + FP + FN}$$

Mathews Correlation Coefficient (MCC) 
$$\frac{(TP * TN) - (FP * FN)}{\sqrt{(TP + FN) * (TP + FP) * (TN + FP) * (TN + FN)}}$$

---

323

## 324 **Feature Selection**

325 During the feature extraction process, we collected a feature vector of 2603 dimensions, which is  
326 significantly large. Therefore, to reduce the feature space and select the relevant features that could help  
327 improve the classification accuracy, we adopted two distinct feature selection approaches, namely  
328 Incremental Feature Selection (IFS) and Genetic Algorithm (GA), a class of evolutionary algorithm, based  
329 feature selection. A detailed description of the two feature selection approaches is provided below.

### 330 **Feature Selection using IFS**

331 IFS starts with an empty feature vector and a feature group is added to the feature vector if the addition of  
332 the feature group to the feature vector improves the performance of the predictor. In case, by adding the  
333 new feature group, the accuracy of the predictor is reduced, this feature group is discarded, and a new  
334 feature group is tested iteratively. During IFS, we performed a 10-fold CV on the benchmark dataset using  
335 XGBoost as a predictor. The values of XGBoost parameters: max\_depth, eta, silent, objective, num\_class,  
336 n\_estimators, min\_child\_weight, subsample, scale\_pos\_weight, tree\_method and max\_bin were set to 6,  
337 0.1, 1, 'multi:softprob', 2, 100, 5, 0.9, 3, 'hist' and 500, respectively and the rest of the parameters were set  
338 to their default value. We used ACC as the evaluation metric to decide whether the new feature group will  
339 a to the feature vector or not. In our implementation of IFS, only the Vander Waals Volume feature group  
340 was ignored from the feature vector as the addition of this feature decreased the ACC of the predictor.  
341 Therefore, through IFS, 2582 features out of 2603 features were selected as relevant features.

### 342 **Feature Selection using GA**

343 GA is a population-based stochastic search technique that mimics the natural process of evolution. It  
344 contains a population of chromosomes where each chromosome represents a possible solution to the  
345 problem under consideration. In general, a GA operates by initializing the population randomly, and by  
346 iteratively updating the population through various operators including elitism, crossover, and mutation to  
347 discover, prioritize and recombine good building blocks present in parent chromosomes to finally obtain  
348 fitter chromosome (Hoque, et al., 2010; Hoque, et al., 2007; Hoque and Iqbal, 2017).

349 Encoding the solution of the problem under consideration in the form of chromosomes and computing the  
350 fitness of the chromosomes are two important steps in setting up the GA. Here, to perform feature selection,  
351 we encode each feature  $f_i$  in our feature space  $F = [f_1, f_2, \dots, f_n]$  by a single bit of 1/0 in a chromosome  
352 space where the value of 1 represents that the  $i^{\text{th}}$  feature is selected, and the value of 0 represents that the  $i^{\text{th}}$   
353 feature is not selected. The length of the chromosome space is equal to the length of the feature space.  
354 Moreover, to compute the fitness of the chromosome, we use the XGBoost algorithm (Chen and Guestrin,  
355 2016). The choice of XGBoost was made because of its fast execution time and reasonable performance  
356 compared to other machine learning classifiers. During feature selection, the values of XGBoost  
357 parameters: `max_depth`, `eta`, `silent`, `objective`, `num_class`, `n_estimators`, `min_child_weight`, `subsample`,  
358 `scale_pos_weight`, `tree_method`, and `max_bin` were set to 6, 0.1, 1, 'multi:softprob', 2, 100, 5, 0.9, 3, 'hist'  
359 and 500, respectively and the rest of the parameters were set to their default value. The values of the  
360 XGBoost parameters mentioned above were identified through the hit and trial approach. In our  
361 implementation, the objective fitness is defined as:

$$obj\_fit = ACC + AUC + MCC \quad (6)$$

362 where, ACC is the accuracy, AUC is the area under the receiver operating characteristic curve and MCC is  
363 the Matthews Correlation Coefficient. To evaluate the fitness of the chromosome, a new data space  $D$  is  
364 obtained which only includes the features for which the chromosome bit is 1. The values of ACC, AUC  
365 and MCC metrics of the  $obj\_fit$  are obtained by performing a 10-fold CV on a new data space  $D$  using the  
366 XGBoost algorithm. Furthermore, the additional parameters of the GA in our implementation were set to a

367 population size of 20, maximum generation to 300, elite-rate to 5%, crossover-rate to 90%, and mutation  
368 rate to 50%. Through this GA based feature selection, only 1346 features out of 2603 features were selected  
369 as relevant features. Therefore, we were able to achieve two-fold benefits from the GA based features  
370 selection which are significantly reduced feature space and relevant features. Finally, we noticed that at  
371 least one of the features from each type of feature we extracted was present in the feature set selected by  
372 GA. Therefore, all the feature types extracted in this study were found to be essential for the prediction of  
373 RBPs.

374

## 375 **Framework of AIRBP**

376 To develop AIRBP predictor for RBPs prediction, we adopted an idea of stacking based machine learning  
377 approach ([Wolpert, 1992](#)) which, has recently been successfully applied to solve various bioinformatics  
378 problems ([Hu, et al., 2015](#); [Iqbal and Hoque, 2018](#); [Mishra, et al., 2018](#); [Nagi and Bhattacharyya, 2013](#)).  
379 Stacking is an ensemble-based machine learning approach, which collects information from multiple  
380 models in different phases and combines them to form a new model. Stacking is considered to yield more  
381 accurate results than the individual machine learning methods as the information gained from more than  
382 one predictive model minimizes the generalization error. The stacking framework includes two-levels of  
383 classifiers, where the classifiers of the first-level are called base-classifiers and the classifiers of the second-  
384 level are called meta-classifiers. In the first level, a set of base-classifiers  $C_1, C_2, \dots, C_N$  is employed  
385 ([Džeroski and Ženko, 2004](#)). The prediction probabilities from the base-classifiers are combined using a  
386 meta-classifier to reduce the generalization error and improve the accuracy of the predictor. To enrich the  
387 meta-classifier with necessary information on the problem space, the classifiers at the base-level are  
388 selected such that their underlying operating principle is different from one another ([Mishra, et al., 2018](#);  
389 [Nagi and Bhattacharyya, 2013](#)).

390 To select the classifiers to use in the first and second level of the AIRBP stacking framework, we analyzed  
391 the performance of six individual classification methods: *i*) Random Decision Forest (RDF) ([Ho, 1995](#)); *ii*)  
392 Bagging (Bag) ([Breiman, 1996](#)); *iii*) Extra Tree (ET) ([Geurts, et al., 2006](#)); *iv*) Extreme Gradient Boosting  
393 (XGBoost or XGB) ([Chen and Guestrin, 2016](#)); *v*) Logistic Regression (LogReg) ([Hastie, et al., 2009](#);  
394 [Szilágyi and Skolnick, 2006](#)); and *vi*) K-Nearest Neighbor (KNN) ([Altman, 1992](#)). The algorithms and their  
395 configuration details are briefly discussed below.

396 *i) RDF:* RDF (Ho, 1995) constructs a multitude of decision trees, each of which is trained on a  
397 random subset of the training data. The sub-set used to create a decision tree is constructed from a given  
398 set of observations of training data by taking ‘m’ observations at random and with replacement (a.k.a.  
399 Bootstrap Sampling). Next, the final predictions are achieved by aggregating the prediction from the  
400 individual decision trees. For classification, the final prediction is made by computing the mode (the value  
401 that appears most often) of the classes (in our case: whether a protein is RNA-binding or non-binding). In  
402 our implementation of the RDF, we used bootstrap samples to construct 1,000 trees (`n_estimators=1,000`)  
403 in the forest, and the rest of the parameters were set to their default value.

404 *ii) Bag:* Bag (Breiman, 1996) machine learning algorithm operates by forming a class of algorithms  
405 that creates several instances of a base classifier/estimator on random subsets of the training samples and  
406 consequently combines their individual predictions to yield a final prediction. It reduces the variance in the  
407 prediction. In our study, the BAG classifier was fit on multiple subsets of data using Bootstrap Sampling  
408 using 1,000 decision trees (`n_estimators=1,000`) and the rest of the parameters were set to their default  
409 value.

410 *iii) ET:* Extremely randomized tree (ET) classifier (Geurts, et al., 2006) operates by fitting several  
411 randomized decision trees (a.k.a. extra-trees) on various sub-sets and uses averaging to improve the  
412 prediction accuracy and control over-fitting. In our implementation, the ETC model was constructed using  
413 1,000 trees (`n_estimators=1,000`) and the quality of a split was assessed by the Gini impurity index. The  
414 rest of the parameters were set to their default value.

415            *iv) XGBoost*: XGBoost (Chen and Guestrin, 2016) follows the same principle of gradient boosting  
416 as the Gradient Boosting Classifier (GBC). GBC (Friedman, 2001) involves three elements: (a) a loss  
417 function to be optimized, (b) a weak learner to make predictions, and (c) an additive model to add weak  
418 learners to minimize the loss function. The objective of GBC is to minimize the loss of the model by adding  
419 weak learners in a stage-wise fashion using a procedure similar to gradient descent. The existing weak  
420 learners in the model are remained unchanged while adding new weak learners. The output from the new  
421 learner is added to the output of the existing sequence of learners to correct or improve the final output of  
422 the model. Unlike GBC, XGBoost performs more regularized model formalization to control over-fitting,  
423 which results in better performance. In addition to increased performance, XGBoost provides higher  
424 computational speed. In our configuration of XGBoost, the values of parameters: `colsample_bytree`,  
425 `gamma`, `min_child_weight`, `learning_rate`, `max_depth`, `n_estimators`, and subsample ratio were optimized  
426 to achieve the best 10-fold cross-validation accuracy using a grid search (Bergstra and Bengio, 2012)  
427 technique. The best values of the parameters: `colsample_bytree`, `gamma`, `min_child_weight`, `learning_rate`,  
428 `max_depth`, `n_estimators`, and subsample ratio were found to be 0.6, 0.3, 1.5, 0.07, 5, 10000 and 0.95,  
429 respectively. And, the rest of the parameters were set to their default value.

430            *v) LogReg*: LogReg (a.k.a. logit or MaxEnt) (Hastie, et al., 2009; Szilágyi and Skolnick, 2006) is a  
431 machine learning classifier that measures the relationship between the dependent categorical variable (in  
432 our case: a RNA-binding or non-binding proteins) and one or more independent variables by generating an  
433 estimation probability using logistic regression. In our implementation, we set all the parameters of LogReg  
434 to their default values.

435            *vi) KNN*: KNN (Altman, 1992) is a non-parametric and lazy learning algorithm. Non-parametric  
436 means it does not make any assumption for underlying data distribution, rather it creates models directly  
437 from the dataset. Furthermore, lazy learning means it does not need any training data points for a model  
438 generation rather uses the training data while testing. It works by learning from the K number of training  
439 samples closest in the distance to the target point in the feature space. The classification decision is made

440 based on the majority-votes obtained from the K nearest neighbors. Here, we set the value of K to 9 and the  
441 rest of the parameters to their default value.

442 All the classification methods mentioned above are built and optimized using python's Scikit-learn library  
443 ([Pedregosa, et al., 2012](#)). In order to design a stacking framework for AIRBP, we evaluated the different  
444 combinations of base-classifiers and finally selected the one that provided the highest performance.

445 The set of stacking framework tested are:

- 446 i) SF1: RDF, XGBoost, LogReg, KNN in base-level and XGBoost in meta-level,
- 447 ii) SF2: Bag, XGBoost, LogReg, KNN in base-level and XGBoost in meta-level and
- 448 iii) SF3: ET, XGBoost, LogReg, KNN in base-level and XGBoost in meta-level.

449 Here, the choice of base-level classifiers is made such that the underlying principle of learning of each of  
450 the classifiers is different from each other ([Mishra, et al., 2018](#)). For example, in SF1, SF2 and SF3 the tree-  
451 based classifiers RDF, Bag and ET are individually combined with the other two methods LogReg and  
452 KNN to learn different information from the problem-space. Additionally, for each of the combination SF1,  
453 SF2 and SF3, the XGBoost classifier is used both in the base as well as in the meta-level because it  
454 performed best among all the other individual methods applied in this work. While examining the 10-fold  
455 CVs performance of the above three combinations, we found that the first stacking framework, SF1 attains  
456 the highest performance. Therefore, we employ four classifiers RDF, XGBoost, LogReg, and KNN as the  
457 base classifiers and another XGBoost as the meta-classifier in AIRBP stacking framework. In AIRBP, the  
458 probabilities of both the classes (RBP and non-RBP) generated by the four base-classifiers are combined  
459 with the 1346 features selected by GA and provided as an input features to the meta-classifier which  
460 eventually provides the prediction for RBPs.



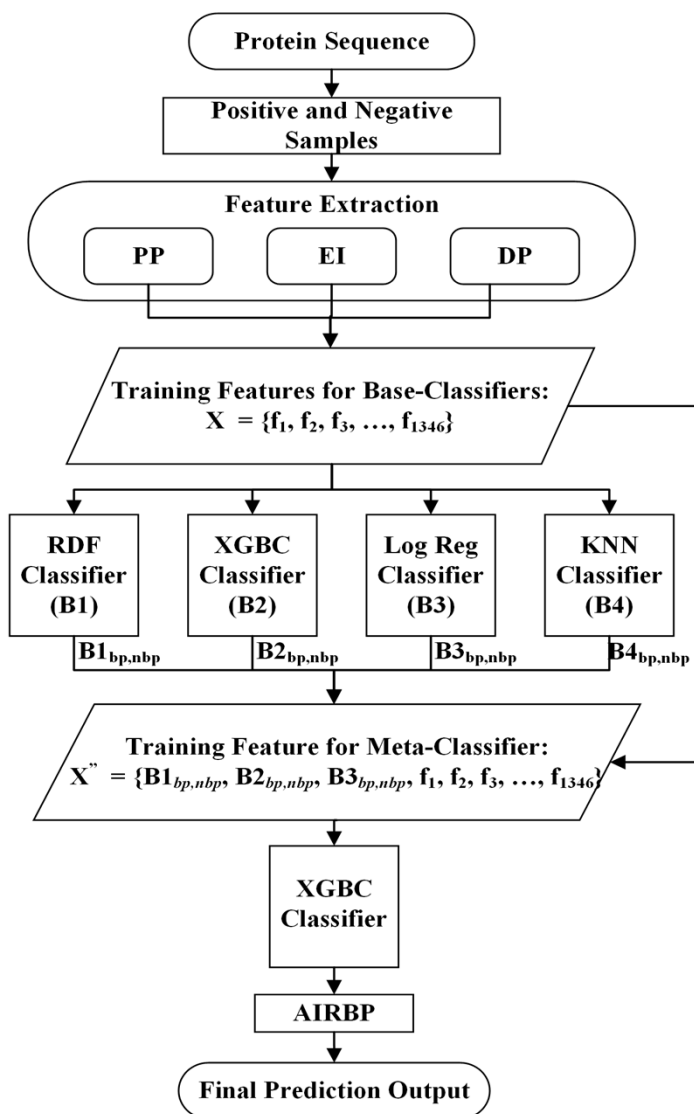

461

462 Fig.4. Illustrates the prediction framework of the AIRBP.

463

## 464 Results

465 In this section, we first demonstrate the results of the feature selection. Then, we show the performance  
 466 comparison of potential base-classifiers and stacking frameworks. Finally, we report the performance of  
 467 AIRBP on the benchmark dataset and three independent test datasets and consequently compare it with the  
 468 existing methods

469 **Table3. Comparison of RBPs prediction results on benchmark dataset before and after feature**  
 470 **selection.**

| Algorithm                                | Number of Features | Evaluation Metrics |              |              |              |             |             |              |             |             |
|------------------------------------------|--------------------|--------------------|--------------|--------------|--------------|-------------|-------------|--------------|-------------|-------------|
|                                          |                    | SN (%)             | SP (%)       | BACC (%)     | ACC (%)      | FPR         | FNR         | PR (%)       | F1-score    | MCC         |
| XGBoost                                  |                    |                    |              |              |              |             |             |              |             |             |
| Before Feature Selection                 | 2603               | 82.11              | 96.81        | 89.46        | 92.64        | 0.03        | 0.18        | 91.06        | 0.86        | 0.82        |
| XGBoost After IFS                        |                    |                    |              |              |              |             |             |              |             |             |
|                                          | 2582               | 82.26              | 96.92        | 89.59        | 92.76        | 0.03        | 0.18        | 91.37        | 0.87        | 0.82        |
| XGBoost After GA-based Feature Selection |                    |                    |              |              |              |             |             |              |             |             |
|                                          | 1346               | <b>89.13</b>       | <b>96.95</b> | <b>91.03</b> | <b>93.59</b> | <b>0.03</b> | <b>0.15</b> | <b>91.71</b> | <b>0.88</b> | <b>0.84</b> |

471 Best score values are **boldfaced**.

472

### 473 Feature Selection

474 To reduce the feature space and select the relevant features that support the classification accuracy, we  
 475 adopted the IFS and GA based feature selection approach. Through IFS and GA, 2582 and 1346 features  
 476 out of 2603 total features were selected as relevant features, respectively. From Table 4, we observe that  
 477 IFS could not reduce the feature space as significantly as GA. Additionally, the performance of XGBoost  
 478 after IFS did not improve by significant value and is lower than the performance resulted from the GA-  
 479 based feature selection. We found that the benefit of GA feature selection was two folds, considerable  
 480 reduction of feature space and identification of relevant features along with improved performance. To

481 assess the impact of individual feature groups that are obtained from GA, we performed feature contribution  
 482 analysis using the XGBoost classifier. The details of the feature contribution analysis are provided below.

483 **Table 4. Contribution of features on the performance of the XGBoost classifier obtained through 10-**  
 484 **fold cross-validation on the benchmark dataset.**

| Features                                                                        | SN<br>(%) | SP<br>(%) | ACC<br>(%) | BACC<br>(%) | fpr  | fnr  | PRE<br>(%) | F1   | MCC  |
|---------------------------------------------------------------------------------|-----------|-----------|------------|-------------|------|------|------------|------|------|
| EDT                                                                             | 65.78     | 93.17     | 85.40      | 79.47       | 0.07 | 0.34 | 79.23      | 0.72 | 0.63 |
| EDT+SDT                                                                         | 74.09     | 95.05     | 89.10      | 84.57       | 0.05 | 0.26 | 85.56      | 0.79 | 0.72 |
| EDT+SDT+DDT                                                                     | 78.35     | 96.18     | 91.12      | 87.27       | 0.04 | 0.22 | 89.04      | 0.83 | 0.78 |
| EDT+SDT+DDT+Hydrophobicity                                                      | 79.29     | 96.81     | 91.84      | 88.05       | 0.03 | 0.21 | 90.77      | 0.85 | 0.79 |
| EDT+SDT+DDT+Hydrophobicity +Polarity                                            | 86.23     | 97.27     | 94.14      | 91.75       | 0.03 | 0.14 | 92.59      | 0.89 | 0.85 |
| EDT+SDT+DDT+Hydrophobicity +Polarity+Polarizability                             | 86.95     | 96.82     | 94.02      | 91.88       | 0.03 | 0.13 | 91.56      | 0.89 | 0.85 |
| EDT+SDT+DDT+Hydrophobicity<br>+Polarity+Polarizability+Van                      | 87.28     | 97.02     | 94.26      | 92.15       | 0.03 | 0.13 | 92.07      | 0.90 | 0.86 |
| EDT+SDT+DDT+Hydrophobicity<br>+Polarity+Polarizability+Van+CT                   | 87.53     | 97.16     | 94.43      | 92.35       | 0.03 | 0.12 | 92.44      | 0.90 | 0.86 |
| EDT+SDT+DDT+Hydrophobicity<br>+Polarity+Polarizability+Van+CT+ACC               | 87.97     | 97.28     | 94.62      | 92.62       | 0.03 | 0.12 | 92.76      | 0.90 | 0.87 |
| EDT+SDT+DDT+Hydrophobicity<br>+Polarity+Polarizability+Van+CT+ACC+SS            | 88.40     | 97.47     | 94.90      | 92.93       | 0.03 | 0.12 | 93.25      | 0.91 | 0.87 |
| EDT+SDT+DDT+Hydrophobicity<br>+Polarity+Polarizability+Van+CT+ACC+SS+RCEM       | 89.12     | 97.37     | 95.03      | 93.24       | 0.03 | 0.11 | 93.06      | 0.91 | 0.88 |
| EDT+SDT+DDT+Hydrophobicity<br>+Polarity+Polarizability+Van+CT+ACC+SS+RCEM+MoRFs | 89.01     | 97.35     | 94.99      | 93.18       | 0.03 | 0.11 | 93.01      | 0.91 | 0.88 |

485 During feature contribution analysis, the values of XGBoost parameters: `colsample_bytree`, `gamma`,  
486 `min_child_weight`, `learning_rate`, `max_depth`, `n_estimators`, `subsample` were set to 0.6, 0.3, 1.5, 0.07, 5,  
487 10000, and 0.95, respectively and the rest of the parameters were set to their default value. The values of  
488 the XGBoost parameters mentioned above were identified through the grid search approach. Table 4 shows  
489 the impact of the addition of individual features on the performance of the XGBoost classifier. Starting with  
490 the first feature group, EDT, we build several XGBoost classifiers by adding one feature group in the feature  
491 vector at a time, through 10-fold cross-validation on the benchmark dataset. Table 4 shows the results of  
492 feature contribution analysis.

493 From Table 4, we can see that incrementally adding the feature group into the feature vector improves the  
494 performance of the XGBoost classifier obtained through 10-fold cross-validation on the benchmark dataset.  
495 The improvement in the performance of the XGBoost classifier obtained by the sequential addition of  
496 feature group into feature vector indicates that all the features implemented in our study are useful. Notably,  
497 we can observe that the addition of SDT and DDT features itself improved the MCC from 0.63 to 0.72 and  
498 0.78, respectively. Further, we can also observe that the addition of the RCEM and MoRFs feature improves  
499 the MCC of the predictor from 0.87 to 0.88. This indicates that the addition of RCEM and MoRFs features  
500 alone provides an improvement of 1.15%.

501

## 502 **Selection of Classifiers for Stacking**

503 To select the methods to use as the base and the meta-classifiers, we analyzed the performance of six  
504 different machine learning algorithms: RDF, Bag, ET, XGBoost, LogReg, and KNN on the benchmark  
505 dataset through 10-fold CV approach. The performance comparison of the individual classifiers on the  
506 benchmark dataset is shown in Table 5.

507 **Table 5. Comparison of various machine learning algorithms on the benchmark dataset through a**  
508 **10-fold CV.**

| Metric/Methods | Bag   | KNN   | LogReg | RDF   | XGBoost      | ET           |
|----------------|-------|-------|--------|-------|--------------|--------------|
| SN (%)         | 82.18 | 57.54 | 82.00  | 72.24 | <b>89.09</b> | 67.44        |
| SP (%)         | 96.84 | 89.17 | 96.39  | 98.47 | 97.48        | <b>98.58</b> |
| BACC (%)       | 89.51 | 73.35 | 89.20  | 85.36 | <b>93.28</b> | 83.01        |
| ACC (%)        | 92.68 | 80.19 | 92.31  | 91.03 | <b>95.10</b> | 89.75        |
| FPR            | 0.032 | 0.108 | 0.036  | 0.015 | 0.025        | <b>0.014</b> |
| FNR            | 0.178 | 0.425 | 0.180  | 0.278 | <b>0.109</b> | 0.326        |
| PR (%)         | 91.14 | 67.77 | 90.00  | 94.92 | 93.34        | <b>94.96</b> |
| F1-score       | 0.866 | 0.622 | 0.858  | 0.820 | <b>0.912</b> | 0.789        |
| MCC            | 0.816 | 0.492 | 0.807  | 0.775 | <b>0.878</b> | 0.742        |

509 Best score values are **boldfaced**.

510 Table 5 further shows that the optimized XGBoost is the best performing classifier among six different  
511 classifiers implemented in our study, in terms of sensitivity, balanced accuracy, accuracy, FNR, F1-score,  
512 and MCC. Moreover, the optimized XGBoost attains sensitivity, balanced accuracy, accuracy, FNR, F1-  
513 score, and MCC of 89.09%, 93.28%, 0.109, 0.912, and 0.878, respectively. Besides, the ET classifier attains  
514 the highest specificity, FPR, and precision of 98.58%, 0.014, and 94.96%, respectively. As the benchmark  
515 dataset is highly imbalanced, we consider MCC as the deciding score as it provides the balanced measure  
516 of any predictor trained on an imbalanced dataset. Furthermore, it is evident from Table 5 that the MCC of  
517 the optimized XGBoost is 18.33%, 13.29%, 8.79%, 78.46%, and 7.59% higher than ET, RDF, LogReg,  
518 KNN, and Bag, respectively. The greater performance of the XGBoost algorithm motivated us to use it both  
519 as a base as well as a meta-classifier in the AIRBP prediction framework.

520

521 **Table 6. Comparison of different stacking framework with a different set of base-classifiers on the**  
522 **benchmark dataset through a 10-fold CV.**

| Metric/Methods | SF1          | SF2   | SF3   |
|----------------|--------------|-------|-------|
| SN (%)         | <b>82.18</b> | 57.54 | 82.00 |
| SP (%)         | <b>96.84</b> | 89.17 | 96.39 |
| BACC (%)       | <b>89.51</b> | 73.35 | 89.20 |
| ACC (%)        | <b>92.68</b> | 80.19 | 92.31 |
| FPR            | <b>0.032</b> | 0.108 | 0.036 |
| FNR            | <b>0.178</b> | 0.425 | 0.180 |
| PR (%)         | <b>91.14</b> | 67.77 | 90.00 |
| F1-score       | <b>0.866</b> | 0.622 | 0.858 |
| MCC            | <b>0.816</b> | 0.492 | 0.807 |

523 Best score values are **boldfaced**.

524 To further select the classifiers to be used at the base-level, we adopted the guidelines of base-classifier  
525 selection based on different underlying principles. Therefore, we used KNN and LogReg as two additional  
526 classifiers at the base-level. Then, we added a single tree-based ensemble method out of three methods,  
527 RDF, Bag, and ET, at a time as the fourth base-classifier and designed three different combinations of  
528 stacking framework, namely SF1, SF2, and SF3. The performance comparison of SF1, SF2 and SF3  
529 stacking framework on the benchmark dataset using 10-fold CV are presented in Table 6. Table 6  
530 demonstrates that both SF1 and SF3 outperform SF2. Moreover, SF1 gained similar performance compared  
531 to SF3 in terms of ACC, F1-score, and MCC. Since our aim through this research is to build a robust system  
532 that makes correct predictions, we choose precision and FPR to be our deciding metrics. From Table 6, it

533 is evident that SF1 has higher precision and lower FPR compared to SF2. Hence, we select SF1, which  
534 includes RDF, XGBoost, LogReg, and KNN as base-classifiers and another XGBoost as a meta-classifier,  
535 as our final predictor.

536

## 537 **Performance Comparison with Existing Approaches on the Benchmark**

### 538 **Dataset**

539 Here, we compare the performance of AIRBP with RBPPred ([Zhang and Liu, 2017](#)) on the benchmark  
540 dataset using the 10-fold CV approach. RBPPred is a top-performing existing approach for the prediction  
541 of RBPs directly from the sequence. Furthermore, it is to be noted that AIRBP uses the same benchmark  
542 dataset as RBPPred. Therefore, for the comparison, the quantities for all the evaluation metrics for RBPPred  
543 are obtained from Zhang and Liu ([Zhang and Liu, 2017](#)). The prediction results of AIRBP and RBPPred on  
544 benchmark dataset computed using 10-fold CV are listed in Table 7.

545 From Table 7, we observed that AIRBP outperforms RBPPred based on all the evaluation metrics applied  
546 in this study. Particularly, AIRBP provides 8.55%, 1.50%, 3.26%, 4.84%, 6.75% and 9.53% improvement  
547 over RBPPred based on SN, SP, ACC, PR, F1-score and MCC, respectively. Besides, in Table 7, we report  
548 the values of BACC, FPR, and FNR only for the AIRBP predictor as the values of these metrics were not  
549 reported by RBPPred. Since our benchmark dataset is highly imbalanced (contains 2767 RBPs and 6987  
550 non-RBPs), which also reflects the natural frequency, we focus on comparing the predictors based on MCC  
551 and F1-score. MCC considers true and false positives as well as negatives and is generally considered as a  
552 balanced measure that can be used even though the classes are of very different sizes.

553 **Table 7. Comparison of AIRBP with existing method on benchmark dataset through 10-fold CV**

| Metric/Methods | RBPPred | AIRBP(%imp.) |
|----------------|---------|--------------|
|----------------|---------|--------------|

|          |       |                      |
|----------|-------|----------------------|
| SN (%)   | 83.07 | <b>90.17 (8.55%)</b> |
| SP (%)   | 96.00 | <b>97.44 (1.50%)</b> |
| BACC (%) | -     | 93.80 (-)            |
| ACC (%)  | 92.36 | <b>95.38 (3.26%)</b> |
| FPR      | -     | 0.026 (-)            |
| FNR      | -     | 0.098 (-)            |
| PR (%)   | 89.00 | <b>93.31 (4.84%)</b> |
| F1-score | 0.859 | <b>0.917 (6.75%)</b> |
| MCC      | 0.808 | <b>0.885 (9.53%)</b> |

554 Best score values are **boldfaced**. ‘%imp’ stands for percentage improvement and ‘-’ represents missing value or the value not  
555 reported by RBPPred and ‘(-)’ denotes that the % imp. cannot be calculated.  
556 Likewise, F1-score is the harmonic average of the precision and recall and is generally considered another  
557 balanced measure when the dataset is imbalanced. Since F1-score considers harmonic average, it is  
558 considered to provide an appropriate score to the model rather than an arithmetic mean. From Table 7, it is  
559 clear that based on MCC and F1-score AIRBP outperforms RBPPred by 9.53% and 6.75%.

## 560 **Performance Comparison with Existing Approaches on the Independent Test** 561 **Set**

### 562 **Performance Comparison with RBPPred**

563 In this section, we further compare the performance of AIRBP with RBPPred predictor on three different  
564 independent test sets, Human, *S. cerevisiae* and *A. thaliana*. Here, we only report the comparison of AIRBP  
565 with RBPPred because RBPPred is the top-performing sequence-based predictor of RBPs in the literature.



566 As reported, RBPPred provides much better performance than SPOT-seq ([Zhao, et al., 2011](#)) and RNApred  
 567 ([Kumar, et al., 2011](#)) predictors, which are the only two additional sequence-based methods that can be  
 568 accessed either through a web server or code is publicly available for download. To perform independent  
 569 testing, we first train AIRBP on a complete benchmark dataset and subsequently test it on three different  
 570 independent test sets, Human, *S. cerevisiae* and *A. thaliana*. The predictive results of AIRBP and RBPPred  
 571 on three different independent test sets are compared in Table 8. Table 8 indicates that AIRBP achieves an  
 572 improvement of 9.32% in SN, 4.54% in ACC, 4.19% in F1-score and 8.50% in MCC over RBPPred on  
 573 Human test set. Likewise, AIRBP achieves an improvement of 9.51% in SN, 4.41% in ACC, 3.52% in F1-  
 574 score and 8.23% in MCC over RBPPred on *S. cerevisiae* test set. Furthermore, while testing on *A. thaliana*,  
 575 AIRBP achieves an improvement of 6.61% in SN, 5.34% in ACC, 4.28% in PR, 3.03% in F1-score and  
 576 10.61% in MCC over RBPPred approach.  
 577 Moreover, while analyzing the average percentage improvement over all the independent test sets AIRBP  
 578 attains improvement of 8.48% in SN, 4.76% in ACC, 0.21% in PR, 3.58% in F1-score and 9.11% in MCC  
 579 over RBPPred. Besides, RBPPred seems to be 7.34% better in an average over three test sets in terms of  
 580 SP (i.e. predicting negative samples or non-RBPs) over AIRBP. However, AIRBP provides a 0.21%  
 581 improvement in an average over three test sets in terms of PR over RBPPred.

582 **Table 8. Comparison of AIRBP with the existing method on independent test sets.**

| Methods | Dataset              | Evaluation Metrics |        |          |         |     |     |        |          |       |
|---------|----------------------|--------------------|--------|----------|---------|-----|-----|--------|----------|-------|
|         |                      | SN (%)             | SP (%) | BACC (%) | ACC (%) | FPR | FNR | PR (%) | F1-score | MCC   |
|         | Human                | 84.28              | 96.65  | -        | 89.00   | -   | -   | 97.65  | 0.905    | 0.788 |
| RBPPred | <i>S. cerevisiae</i> | 86.16              | 94.59  | -        | 87.73   | -   | -   | 96.52  | 0.910    | 0.729 |
|         | <i>A. thaliana</i>   | 86.40              | 94.59  | -        | 87.02   | -   | -   | 94.59  | 0.925    | 0.537 |

|       |               |              |           |       |              |       |       |              |              |              |
|-------|---------------|--------------|-----------|-------|--------------|-------|-------|--------------|--------------|--------------|
|       | Human         | <b>92.14</b> | 94.52     | 93.33 | <b>93.04</b> | 0.055 | 0.079 | 96.53        | <b>0.943</b> | <b>0.855</b> |
|       | (% imp.)      | (9.32%)      | (-2.21%)  | (-)   | (4.54%)      | (-)   | (-)   | (-1.14%)     | (4.19%)      | (8.50%)      |
| AIRBP | S. cerevisiae | <b>94.35</b> | 84.33     | 89.34 | <b>91.60</b> | 0.157 | 0.057 | 94.09        | <b>0.942</b> | <b>0.789</b> |
|       | (% imp.)      | (9.51%)      | (-10.85%) | (-)   | (4.41%)      | (-)   | (-)   | (-2.52%)     | (3.52%)      | (8.23%)      |
|       | A. thaliana   | <b>92.11</b> | 86.11     | 89.11 | <b>91.67</b> | 0.139 | 0.079 | <b>98.82</b> | <b>0.953</b> | <b>0.594</b> |
|       | (% imp.)      | (6.61%)      | (-8.97%)  | (-)   | (5.34%)      | (-)   | (-)   | (4.28%)      | (3.03%)      | (10.61%)     |
|       | (avg. % imp.) | (8.48%)      | (-7.34%)  | (-)   | (4.76)       | (-)   | (-)   | (0.21%)      | (3.58%)      | (9.11%)      |

583

584 Here, ‘imp.’ stands for improvement. The ‘% imp.’ represents the improvement in percentage achieved by AIRBP for  
 585 corresponding independent test set for corresponding evaluation metric over the RBPPred method. Likewise, the ‘avg. % imp.’  
 586 represents the average percentage improvement achieved by AIRBP for all independent test set for corresponding evaluation metric  
 587 over the RBPPred method. Additionally, ‘-’ represents missing value or the value not reported by RBPPred and ‘(-)’ denotes that  
 588 the % imp. or avg. % imp. cannot be calculated.

589 Additionally, as stated above, for the imbalanced dataset the F1-score and MCC are widely used as a  
 590 balanced measure between sensitivity and specificity. Our predictor, AIRBP shows consistent improvement  
 591 in F1-score and MCC over RBPPred for all three independent test sets. Specifically, AIRBP provides 4.19%  
 592 and 8.05% improvement in F1-score and MCC, respectively over RBPPred while tested on the Human test  
 593 set. Similarly, AIRBP shows 3.52% and 8.23% improvement in F1-score and MCC, respectively, over  
 594 RBPPred on S. cerevisiae as well as 3.03% and 10.61% improvement in F1-score and MCC, respectively  
 595 over RBPPred on A. thaliana test set. Finally, based on an average percentage improvement (calculated  
 596 over three different datasets) in F1-score and MCC, AIRBP outperforms RBPPred by 3.58% and 9.11%.

### 597 **Performance Comparison with Deep-RBPPred and TriPepSVM**

598 In this section, we compare the performance of AIRBP with two additional predictors, Deep-RBPPred  
 599 ([Zheng, et al., 2018](#)) and TriPepSVM ([Bressin, et al., 2019](#)) on three different independent test sets, Human,

600 *S. cerevisiae* and *A. thaliana*. To compare, first, we downloaded both the software Deep-RBPPred and  
601 TriPepSVM that are openly available from the internet. Next, we ran both Deep-RBPPred and TriPepSVM  
602 on the three independent test datasets, ATH, SC, and Human, respectively. The details of the process  
603 adopted for the comparison and the results obtained are provided below:

#### 604 **Comparison with Deep-RBPPred**

605 In Deep-RBPPred software, to make predictions, users can either choose a model trained with the balanced  
606 dataset (balanced model) or a model trained with the imbalanced dataset (imbalanced model). In our  
607 implementation, we ran both balanced and imbalanced model of Deep-RBPPred on the three independent  
608 test datasets. Table 9 shows the comparison between the proposed method, AIRBP and an existing method  
609 Deep-RBPPred on three independent test datasets. From Table 9, we can see that AIRBP consistently  
610 results in a higher number of True Positive (TP) count, which indicates that AIRBP is better than Deep-  
611 RBPPred in identifying RNA-binding proteins correctly, which is the primary objective of this work. The  
612 number of RNA-binding proteins correctly predicted by AIRBP is 15 counts less than the Deep-RBPPred  
613 Balanced model for the Human test dataset. However, the number of RNA-binding proteins correctly  
614 predicted by AIRBP is 64 counts higher than Deep-RBPPred Imbalanced for the same Human test dataset.  
615 Moreover, AIRBP accurately predicts 8 and 48 count of additional RNA-binding proteins compared to  
616 DeepRBPPred Balanced and Deep-RBPPred Imbalanced model for the ATH dataset, respectively.  
617 Similarly, AIRBP correctly predicts 9 and 39 count of other RNA-binding proteins compared to  
618 DeepRBPPred Balanced and Deep-RBPPred Imbalanced model for the SC dataset, respectively.

619 **Table 9. Comparison between AIRBP and Deep-RBPPred on three independent test datasets.**

| <b>AIRBP</b> |            |            |              | <b>Deep-RBPPred Balanced</b> |           |              | <b>Deep-RBPPred Imbalanced</b> |           |              |
|--------------|------------|------------|--------------|------------------------------|-----------|--------------|--------------------------------|-----------|--------------|
|              | <b>ATH</b> | <b>SC</b>  | <b>Human</b> | <b>ATH</b>                   | <b>SC</b> | <b>Human</b> | <b>ATH</b>                     | <b>SC</b> | <b>Human</b> |
| TP           | <b>420</b> | <b>334</b> | 891          | 412                          | 325       | <b>906</b>   | 372                            | 295       | 827          |

|    |           |            |            |    |     |     |    |     |     |
|----|-----------|------------|------------|----|-----|-----|----|-----|-----|
| FN | 36        | 20         | 76         | 44 | 29  | 61  | 84 | 59  | 140 |
| TN | <b>31</b> | <b>113</b> | <b>552</b> | 31 | 103 | 508 | 33 | 116 | 548 |
| FP | 5         | 21         | 32         | 5  | 31  | 76  | 3  | 18  | 36  |

620 Best score values are **boldfaced**.

621 Moreover, we compare the performance of AIRBP with Deep-RBPPred on the three new independent test  
622 datasets (ATH-Filtered, SC-Filtered, and Human-Filtered) that we created by filtering sequences through  
623 similarity search using CD-Hit program in Table 10. We created ATH-Filtered, SC-Filtered, and Human-  
624 Filtered by filtering similar sequences that are more than 25% similar between training and ATH, SC, and  
625 Human datasets, respectively using CD-Hit program. Table 10 shows that AIRBP attains the highest count  
626 of true positive (TP) or in other words, predicts the highest number of RNA-binding proteins correctly  
627 compared to Deep-RBPPred Balanced, Deep-RBPPred Unbalanced and RBPPred for both SC and Human  
628 datasets. Further, we can see that for the ATH dataset the TP count of AIRBP is just 1 lower than Deep-  
629 RBPPred Balance, whereas 1 and 4 counts are higher than Deep-RBPPred Unbalanced and RBPPred,  
630 respectively. Again, we are focusing on TP counts because our major goal here is to accurately predict  
631 RNA-binding proteins. In summary, the results presented in Tables 8 and 9 show that AIRBP is a better  
632 predictor compared to both RBPPred and Deep-RBPPred in the majority of the cases.

633 **Table 10. Comparison of AIRBP with RBPPred and Deep-RBPPred on the three independent test**  
634 **datasets ATH-Filtered, SC-Filtered, and Human-Filtered.**

| <b>AIRBP</b>        |     |    |       |
|---------------------|-----|----|-------|
|                     | ATH | SC | Human |
| True Positive (TP)  | 42  | 37 | 54    |
| False Positive (FP) | 4   | 12 | 6     |

|                     |    |    |     |
|---------------------|----|----|-----|
| True Negative (TN)  | 11 | 39 | 137 |
| False Negative (FN) | 2  | 0  | 2   |

**Deep-RBPPred Balance**

|                     | ATH | SC | Human |
|---------------------|-----|----|-------|
| True Positive (TP)  | 43  | 35 | 54    |
| False Positive (FP) | 2   | 15 | 20    |
| True Negative (TN)  | 13  | 36 | 123   |
| False Negative (FN) | 1   | 2  | 2     |

**Deep-RBPPred Unbalance**

|                     | ATH | SC | Human |
|---------------------|-----|----|-------|
| True Positive (TP)  | 41  | 32 | 50    |
| False Positive (FP) | 1   | 9  | 13    |
| True Negative (TN)  | 14  | 42 | 130   |
| False Negative (FN) | 3   | 5  | 6     |

**RBPPred**

|                     | ATH | SC | Human |
|---------------------|-----|----|-------|
| True Positive (TP)  | 38  | 35 | 52    |
| False Positive (FP) | 2   | 7  | 6     |
| True Negative (TN)  | 13  | 44 | 137   |

|                     |   |   |   |
|---------------------|---|---|---|
| False Negative (FN) | 6 | 2 | 4 |
|---------------------|---|---|---|

635 **Comparison with TriPepSVM**

636 Likewise, to compare AIRBP with TriPepSVM, we ran TriPepSVM on three independent test datasets.  
637 While running TriPepSVM, we discovered that it requires Uniprot taxon id, which is by default set to 9606  
638 (for humans). This indicates that TriPepSVM must have been trained based on the species-wise dataset.  
639 For a quick check, we ran TriPepSVM on the ATH dataset with Uniprot taxon id, ATH, and Human,  
640 respectively, and with no surprise, we found that TriPepSVM resulted in inferior performance, while we  
641 ran it on ATH dataset with Human taxon id. So, one of the limitations of TriPepSVM is that it does not  
642 apply to the datasets of new species. The performance of TriPepSVM while using both ATH and Human  
643 taxon id is shown in Table 11. From Table 11, we can conclude that TriPepSVM is not a generic method  
644 that can be applied to any species. Instead, it is strongly dependent on the Uniprot taxon id as well as it will  
645 only perform well for particular species but not for any species. Therefore, we would like to highlight that  
646 the comparison between AIRBP and TriPepSVM is not an apple to apple comparison.

647 **Table 11. Performance of TriPepSVM on ATH dataset while using ATH and Human taxon id,**  
648 **respectively.**

| TriPePSVM with ATH Taxon ID |     | TriPepSVM with Human Taxon ID |
|-----------------------------|-----|-------------------------------|
| TP                          | 435 | 271                           |
| FN                          | 21  | 185                           |
| TN                          | 35  | 24                            |
| FP                          | 1   | 12                            |

649 Further, Table 12 shows the comparison between the proposed method, AIRBP and an existing method  
650 TriPepSVM on three independent test datasets.

651 **Table 12. Comparison between AIRBP and TriPepSVM on three independent test datasets.**

|    | AIRBP |     |       | TriPepSVM |     |       |
|----|-------|-----|-------|-----------|-----|-------|
|    | ATH   | SC  | Human | ATH       | SC  | Human |
| TP | 420   | 334 | 891   | 435       | 42  | 953   |
| FN | 36    | 20  | 76    | 21        | 312 | 14    |
| TN | 31    | 113 | 552   | 35        | 135 | 462   |
| FP | 5     | 21  | 32    | 1         | 0   | 122   |

652 From Table 12, it is evident that even though TriPepSVM performs better than AIRBP on two independent  
653 test datasets, ATH and Human, the performance of TriPepSVM is exceptionally poor on SC test set. Again,  
654 better performance of TriPepSVM on some test set whereas, exceptionally poor performance on another  
655 test set also indicates that TriPepSVM is not a generic tool rather, it is trained on dataset of specific species  
656 and will only perform well for that particular species. On the contrary, AIRBP shows a very consistent  
657 performance on all the test datasets and therefore, AIRBP is a generic tool that can be applied for the  
658 prediction of RNA-binding proteins that may belong to any type of species. In other words, AIRBP is not  
659 tied to any particular species and can identify RNA-binding proteins from any species.

660 Further, the poor performance of TriPepSVM on SC test dataset encouraged us to perform additional  
661 analysis to identify if combining TriPepSVM with AIRBP would correct issues with TriPepSVM. Our first  
662 analysis involved combining TriPepSVM within the stacking framework of AIRBP. We added TriPepSVM  
663 as one of the base-layer classifiers into our stacking framework. Specifically, we ran TriPepSVM on our  
664 training dataset to collect prediction probabilities and added these probabilities as a feature vector to re-  
665 train the meta-layer classifier, XGBoost of our stacking framework. In Table 13, we compare the  
666 performance of AIRBP with the new stacking framework created by adding TriPepSVM at the base layer  
667 of AIRBP, we represent this new stacking framework as AIRBP+TriPepSVM.

668 **Table 13. Comparison of AIRBP with AIRBP+TriPepSVM on the benchmark dataset through a 10-**  
669 **fold CV.**

| <b>Metric/Methods</b> | <b>TriPepSVM+AIRBP</b> | <b>AIRBP</b> |
|-----------------------|------------------------|--------------|
| SN (%)                | 90.57                  | 90.17        |
| SP (%)                | 97.57                  | 97.44        |
| BACC (%)              | 94.06                  | 93.80        |
| ACC (%)               | 95.58                  | 95.38        |
| FPR                   | 0.024                  | 0.026        |
| FNR                   | 0.094                  | 0.098        |
| PR (%)                | 93.65                  | 93.31        |
| F1-score              | 0.921                  | 0.917        |
| MCC                   | 0.890                  | 0.885        |

670 From Table 13, we can see that adding TriPepSVM as the base-layer classifier resulted in a slight  
671 improvement in the performance of all the performance measures used in our study. Particularly, ACC, F1-  
672 score and MCC of AIRBP+TriPepSVM framework increased from 95.38, 0.917, and 0.885 to 95.58, 0.921,  
673 and 0.890, respectively.

674 Next, we tested the performance of AIRBP+TriPepSVM on three independent test datasets. In Table 14,  
675 we compare the performance of AIRBP with the AIRBP+TriPepSVM framework on three independent test  
676 datasets. From Table 14, we can see that the performance of the AIRBP+TriPepSVM framework is slighter  
677 better than AIRBP for the Human test set. However, AIRBP outperforms AIRBP+TriPepSVM on SC and  
678 ATH test sets. Notably, for the Human test set, AIRBP+TriPepSVM results in a thinly better MCC of 0.858



679 compared to MCC of 0.855 by AIRBP. However, for SC and ATH test set, AIRBP results in significantly  
 680 better with MCC of 0.789 and 0.594 compared to MCC of 0.465 and 0.54 by AIRBP+TriPepSVM. Overall,  
 681 the comparison of AIRBP with TriPepSVM and AIRBP+TriPepSVM indicates that TriPepSVM suffers  
 682 from an inconsistency issue as it works better on one dataset, whereas it performs very poorly on another  
 683 dataset. This inconsistency can be overcome by adding TriPepSVM as a base layer in AIRBP to produce  
 684 the AIRBP+TriPepSVM framework. However, the performance of AIRBP+TriPepSVM on independent  
 685 test datasets is still lower compared to AIRBP. This helps us conclude that AIRBP performs better  
 686 compared to Deep-RBPPred in the majority of the cases. Moreover, we would also like to highlight that  
 687 comparison between AIRBP and TriPepSVM is not an apple-to-apple comparison as TriPepSVM is trained  
 688 based on specific species and is not a generic method as AIRBP.

689 **Table 14. Comparison of AIRBP, TriPepSVM, and AIRBP+TriPepSVM on three independent test**  
 690 **datasets.**

| Methods             | Dataset | Evaluation Metrics |           |             |            |       |       |           |              |       |
|---------------------|---------|--------------------|-----------|-------------|------------|-------|-------|-----------|--------------|-------|
|                     |         | SN<br>(%)          | SP<br>(%) | BACC<br>(%) | ACC<br>(%) | FPR   | FNR   | PR<br>(%) | F1-<br>score | MCC   |
| AIRBP+<br>TriPepSVM | Human   | 92.87              | 93.84     | 93.35       | 93.23      | 0.062 | 0.071 | 96.14     | 0.945        | 0.858 |
|                     | SC      | 58.48              | 93.28     | 75.88       | 75.88      | 0.067 | 0.415 | 95.83     | 0.726        | 0.465 |
|                     | ATH     | 87.50              | 94.44     | 90.97       | 88.08      | 0.056 | 0.125 | 99.50     | 0.931        | 0.54  |
| AIRBP               | Human   | 92.14              | 94.52     | 93.33       | 93.04      | 0.055 | 0.079 | 96.53     | 0.943        | 0.855 |
|                     | SC      | 94.35              | 84.33     | 89.34       | 91.60      | 0.157 | 0.057 | 94.09     | 0.942        | 0.789 |
|                     | ATH     | 92.11              | 86.11     | 89.11       | 91.67      | 0.139 | 0.079 | 98.82     | 0.953        | 0.594 |

691 The above comparison of results indicates that the proposed method, AIRBP outperforms the existing  
692 methods and is a very promising predictor. We believe that this comprehensive investigation of the stacking  
693 based machine learning framework and features in predicting RNA binding proteins might be useful for  
694 future proteomics studies.

695

## 696 **Conclusions**

697 In this work, we constructed a stacking based machine learning framework, called AIRBP, for the  
698 prediction of RNA-binding proteins directly from the protein sequence. To improve the prediction accuracy  
699 of RNA-binding proteins, we have investigated and used various feature extraction and encoding  
700 techniques, different feature selection techniques along with an advanced machine learning technique called  
701 stacking. We extracted multiple features, including evolutionary information, physiochemical properties,  
702 and disordered properties and applied different encoding techniques such as composition, transition and  
703 distribution, conjoint triad, PSSM distance transformation, and residue-wise contact energy matrix  
704 transformation to encode the protein sequence in terms of features. Next, we applied two different feature  
705 selection techniques, incremental feature selection and evolutionary algorithm based feature selection to  
706 identify the relevant features as well as to reduce the feature space significantly. Next, only the relevant  
707 features are used to train the ensemble of predictors at the first-level (i.e. base-layer) of the stacking  
708 framework. Then, the prediction probabilities from the first-level predictors are combined with the  
709 originally selected features and used to train the predictor at the second-level (i.e. meta-layer) of the stacking  
710 framework. Finally, the AIRBP stacking framework achieves a 10-fold CV accuracy, F1-score, and MCC  
711 of 95.38%, 0.917 and 0.885 respectively, on the benchmark dataset. While performing the independent test,  
712 AIRBP achieves an accuracy, F1-score, and MCC of 93.04%, 0.943 and 0.855, for Human test set; 91.60%,  
713 0.942 and 0.789 for *S. cerevisiae* test set; and 91.67%, 0.953 and 0.594 for *A. thaliana* test set, respectively.  
714 These promising results indicate that the stacking framework helps improve the accuracy significantly by

715 reducing the generalization error. Furthermore, in comparison with the top-performing method, RBPPred,  
716 AIRBP achieves 3.26%, 6.75% and 9.53% improvement in terms of accuracy, F1-score and MCC  
717 respectively, based on a benchmark dataset. F1-score and MCC are two widely used measures for the  
718 imbalanced dataset. Moreover, the average percentage improvement, calculated over three different  
719 independent test sets, AIRBP outperforms RBPPred by 4.76%, 3.58% and 9.11% in terms of accuracy, F1-  
720 score, and MCC, respectively. These outcomes help us summarize that the AIRBP can be effectively used  
721 for accurate and fast identification and annotation of RNA-binding proteins directly from the protein  
722 sequence and can provide valuable insights for treating critical diseases.

## 723 **Acknowledgments**

724 We would like to thank the anonymous reviewers.

## 725 **Author Contributions**

726 Conceived and designed the experiments: AM, RK MTH. Performed the experiments: AM, RK. Analyzed the data:  
727 AM, RK. Contributed reagents/materials/analysis tools: MTH. Wrote the paper: AM, RK MTH.

## 728 **References**

- 729 1. Altman, N.S. (1992) An Introduction to Kernel and Nearest-Neighbor Nonparametric Regression,  
730 *The American Statistician*, **46**, 175-185.
- 731 2. Altschul, S.F., *et al.* (1990) Basic Local Alignment Search Tool., *J. Mol. Biol.*, **215**, 403-410.
- 732 3. Babu, M.M., *et al.* (2011) Intrinsically disordered proteins: regulation and disease., *Current*  
733 *Opinion in Structural Biology*, **21**, 432-440.
- 734 4. Bah, A. and Forman-Kay, J.D. (2016) Modulation of intrinsically disordered protein function by  
735 post-translational modifications., *Journal of Biological Chemistry*, **291**, 6696-6705.

- 736 5. Baltz, A.G., *et al.* (2012) The mRNA-Bound Proteome and Its Global Occupancy Profile on  
737 Protein-Coding Transcripts, *Molecular Cell*, **46**, 674-690.
- 738 6. Beckmann, B.M., *et al.* (2015) The RNA-binding proteomes from yeast to man harbour conserved  
739 enigmRBPs, *Nature Communications*, **6**.
- 740 7. Bergstra, J. and Bengio, Y. (2012) Random Search for Hyper-Parameter Optimization, *Journal of*  
741 *Machine Learning Research*, **13**.
- 742 8. Breiman, L. (1996) Bagging predictors, *Machine Learning*, **24**, 123-140.
- 743 9. Bressin, A., *et al.* (2019) TriPepSVM: de novo prediction of RNA-binding proteins based on short  
744 amino acid motifs., *Nucleic Acids Research*, **47**, 4406–4417.
- 745 10. Calabretta, S. and Richard, S. (2015) Emerging roles of disordered sequences in RNA-binding  
746 proteins., *Trends in Biological Sciences*, **40**, 662-672.
- 747 11. Castello, A., *et al.* (2012) Insights into RNA biology from an atlas of mammalian mRNA-binding  
748 proteins., *Cell*, **149**, 1393-1406.
- 749 12. Chen, T. and Guestrin, C. (2016) XGBoost: a scalable tree boosting system. In, *Proceedings of the*  
750 *22Nd ACM SIGKDD International Conference on Knowledge Discovery and Data Mining*. ACM,  
751 New York, NY, USA, pp. 785-794.
- 752 13. Dosztányi, Z., *et al.* (2005) The pairwise energy content estimated from amino acid composition  
753 discriminates between folded and intrinsically unstructured proteins, *Journal of Molecular Biology*,  
754 **347**, 827-839.
- 755 14. Dubchak, I., *et al.* (1995) Prediction of protein folding class using global description of amino acid  
756 sequence., *Proceedings of the National Acadecmy of Sciences of the United States of America*, **92**,  
757 8700-8704.

- 758 15. Dubchak, I., *et al.* (1999) Recognition of a protein fold in the context of the SCOP classification.,  
759 *Proteins*, **35**, 401-407.
- 760 16. Džeroski, S. and Ženko, B. (2004) Is Combining Classifiers with Stacking Better than Selecting  
761 the Best One?, *Machine Learning*, **54**, 255-273.
- 762 17. Geurts, P., Ernst, D. and Wehenkel, L. (2006) Extremely randomized trees, *Machine Learning*, **63**,  
763 3-42.
- 764 18. Glisovic, T., *et al.* (2008) RNA-binding proteins and post-transcriptional gene regulation, *FEBS*  
765 *Letters*, **582**.
- 766 19. Greenberg, J.R. (1979) Ultraviolet light-induced crosslinking of mRNA to proteins, *Nucleic Acids*  
767 *Research*, **6**, 715-732.
- 768 20. Han, L.Y., *et al.* (2004) Prediction of RNA-binding proteins from primary sequence by a support  
769 vector machine approach, *RNA*, **10**.
- 770 21. Hastie, T., Tibshirani, R. and Friedman, J. (2009) *The Elements of Statistical Learning*. Springer  
771 Series in Statistics. Springer-Verlag New York.
- 772 22. Ho, T.K. (1995) Random decision forests. *Document Analysis and Recognition, 1995., Proceedings*  
773 *of the Third International Conference on*. IEEE, Montreal, Que., Canada, pp. 278-282.
- 774 23. Hoque, M.T., *et al.* (2010) DFS Generated Pathways in GA Crossover for Protein Structure  
775 Prediction, *Neurocomputing*, **73**, 2308-2316.
- 776 24. Hoque, M.T., *et al.* (2016) sDFIRE: Sequence-specific statistical energy function for protein  
777 structure prediction by decoy selections., *Journal of Computational Chemistry*, **37**, 1119-1124.
- 778 25. Hoque, M.T., Chetty, M. and Sattar, A. (2007) Protein Folding Prediction in 3D FCC HP Lattice  
779 Model using Genetic Algorithm. *IEEE Congress on Evolutionary Computation (CEC) Singapore*.  
780 Singapore, pp. 4138-4145.

- 781 26. Hoque, M.T. and Iqbal, S. (2017) Genetic algorithm-based improved sampling for protein structure  
782 prediction, *International Journal of Bio-Inspired Computation*, **9**, 129-141.
- 783 27. Hu, Q., *et al.* (2015) A Stacking-Based Approach to Identify Translated Upstream Open Reading  
784 Frames in Arabidopsis Thaliana. *International Symposium on Bioinformatics Research and*  
785 *Applications*. Bioinformatics Research and Applications, pp. 138-149.
- 786 28. Iqbal, S. and Hoque, M.T. (2018) PBRpredict-Suite: a suite of models to predict peptide-  
787 recognition domain residues from protein sequence., *Bioinformatics*, bty352-bty352.
- 788 29. Iqbal, S., Mishra, A. and Hoque, T. (2015) Improved Prediction of Accessible Surface Area Results  
789 in Efficient Energy Function Application, *Journal of Theoretical Biology*, **380**, 380-391.
- 790 30. Järvelin, A.I., *et al.* (2016) The new (dis)order in RNA regulation., *Cell Communications and*  
791 *Signaling*, **14**.
- 792 31. Kumar, M., Gromiha, M.M. and Raghava, G.P. (2007) Identification of DNA-binding proteins  
793 using support vector machines and evolutionary profiles, *BMC Bioinformatics*, **8**, 1471-2105.
- 794 32. Kumar, M., Gromiha, M.M. and Raghava, G.P.S. (2008) Prediction of RNA binding sites in a  
795 protein using SVM and PSSM profile, *Proteins*, **71**.
- 796 33. Kumar, M., Gromiha, M.M. and Raghava, G.P.S. (2011) SVM based prediction of RNA-binding  
797 proteins using binding residues and evolutionary information., *Journal of Molecular Recognition*,  
798 **24**, 303-313.
- 799 34. Kwon, S.C., *et al.* (2013) The RNA-binding protein repertoire of embryonic stem cells., *Nature*  
800 *Structural & Molecular Biology*, **20**, 1122-1130.
- 801 35. Lina, Y.-H., *et al.* (2017) The intrinsically disordered N-terminal domain of galectin-3 dynamically  
802 mediates multisite self-association of the protein through fuzzy interactions., *Journal of Biological*  
803 *Chemistry*, **292**, 17845-17856.

- 804 36. Lindberg, U. and Sundquist, B. (1974) Isolation of messenger ribonucleoproteins from mammalian  
805 cells, *Journal of Molecular Biology*, **86**, 451-468.
- 806 37. Liu, S. RBPPred: Data sets updated.
- 807 38. Ma, X., Guo, J. and Sun, X. (2015) Sequence-based prediction of RNA-binding proteins using  
808 random forest with minimum redundancy maximum relevance feature selection., *BioMed Research*  
809 *International*, **425810**.
- 810 39. Ma, X., *et al.* (2015) PRBP: prediction of RNA-binding proteins using a random forest algorithm  
811 combined with an RNA-binding residue predictor., *IEEE/ACM Transactions on Computational*  
812 *Biology and Bioinformatics*, **12**, 1385-1393.
- 813 40. Magnan, C.N. and Baldi, P. (2014) SSpro/ACCpro 5: almost perfect prediction of protein  
814 secondary structure and relative solvent accessibility using profiles, machine learning and structural  
815 similarity., *Bioinformatics*, **30**, 2592-2597.
- 816 41. Mishra, A. and Hoque, M.T. (2017) Three-Dimensional Ideal Gas Reference State Based Energy  
817 Function, *Current Bioinformatics*, **12**, 171-180.
- 818 42. Mishra, A., Iqbal, S. and Hoque, M.T. (2016) Discriminate protein decoys from native by using a  
819 scoring function based on ubiquitous Phi and Psi angles computed for all atom., *Journal of*  
820 *theoretical biology*, **398**, 112-121.
- 821 43. Mishra, A., Pokhrel, P. and Hoque, M.T. (2018) StackDPPred: a stacking based prediction of DNA-  
822 binding protein from sequence., *Bioinformatics*, **35**, 433-441.
- 823 44. Mitchell, S.F., *et al.* (2013) Global analysis of Yeast mRNPs., *Nature Structural & Molecular*  
824 *Biology*, **20**, 127-133.
- 825 45. Mohan, A., *et al.* (2006) Analysis of Molecular Recognition Features (MoRFs), *Journal of*  
826 *Molecular Biology*, **362**, 1043-1059.

- 827 46. Nagi, S. and Bhattacharyya, D.K. (2013) Classification of microarray cancer data using ensemble  
828 approach, *Network Modeling Analysis in Health Informatics and Bioinformatics*, **2**, 159-173.
- 829 47. Paz, I., *et al.* (2016) BindUP: a web server for non-homology-based prediction of DNA and RNA  
830 binding proteins., *Nucleic Acids Research*, **44**, W568-W574.
- 831 48. Pedregosa, F., *et al.* (2012) Scikit-learn: Machine learning in python., *Journal of Machine Learning*  
832 *Research*, **12**.
- 833 49. Sharma, R., *et al.* (2018) MoRFPred-plus: computational identification of MoRFs in protein  
834 sequences using physicochemical properties and HMM profiles., *Journal of Theoretical Biology*,  
835 **437**, 9-16.
- 836 50. Sharma, R., *et al.* (2018) OPAL: prediction of MoRF regions in intrinsically disordered protein  
837 sequences., *Bioinformatics*, **34**, 1850-1858.
- 838 51. Sharma, R., *et al.* (2018) OPAL+: length-specific MoRF prediction in intrinsically disordered  
839 protein sequences., *Proteomics*, **1800058**.
- 840 52. Shazman, S. and Mandel-Gutfreund, Y. (2008) Classifying RNA-binding proteins based on  
841 electrostatic properties., *PLoS Computational Biology*, **4**.
- 842 53. Shen, J., *et al.* (2007) Predicting protein–protein interactions based only on sequences information.,  
843 *Proceedings of the National Academy of Sciences of the United States of America*, **104**, 4337-  
844 4341.
- 845 54. Si, J., *et al.* (2015) Computational Prediction of RNA-Binding Proteins and Binding Sites,  
846 *International Journal of Molecular Sciences*, **16**, 26303-26317.
- 847 55. Szilágyi, A. and Skolnick, J. (2006) Efficient prediction of nucleic acid binding function from low-  
848 resolution protein structures., *Journal of Molecular Biology*, **358**, 922-933.



- 849 56. Vacic, V., *et al.* (2007) Characterization of molecular recognition features, MoRFs, and their  
850 binding partners, *J Proteome Res.*, **6**, 2351-2366.
- 851 57. Wagenmakers, A.J.M., Reinders, R.J. and Venrooij, W.J.V. (1980) Cross-linking of mRNA to  
852 Proteins by Irradiation of Intact Cells with Ultraviolet Light, *European Journal of Biochemistry*,  
853 **112**.
- 854 58. Wang, Y., *et al.* (2013) De novo prediction of RNA-protein interactions from sequence  
855 information., *Molecular BioSystems*, **9**, 133-142.
- 856 59. Wolpert, D.H. (1992) Stacked generalization, *Neural Networks*, **5**, 241-259.
- 857 60. Wu, C.H., *et al.* (2006) The Universal Protein Resource (UniProt): an expanding universe of protein  
858 information, *Nucleic Acids Research*.
- 859 61. Wurth, L. (2012) Versatility of RNA-Binding Proteins in Cancer, *International Journal of*  
860 *Genomics*, **2012**, 178525.
- 861 62. Xu, R., *et al.* (2015) Identifying DNA-binding proteins by combining support vector machine and  
862 PSSM distance transformation, *BMC Systems Biology*, **9**.
- 863 63. Yang, Y., *et al.* (2012) A new size-independent score for pairwise protein structure alignment and  
864 its application to structure classification and nucleic-acid binding prediction., *Proteins*, **80**, 2080-  
865 2088.
- 866 64. Zhang, L., Zhao, X. and Kong, L. (2014) Predict protein structural class for low-similarity  
867 sequences by evolutionary difference information into the general form of Chou's pseudo amino  
868 acid composition., *Journal of Theoretical Biology*, **355**, 105-110.
- 869 65. Zhang, X. and Liu, S. (2017) RBPPred: predicting RNA-binding proteins from sequence using  
870 SVM, *Bioinformatics*, **33**, 854-862.

- 871 66. Zhao, H., Yang, Y. and Zhou, Y. (2011) Highly accurate and high-resolution function prediction  
872 of RNA binding proteins by fold recognition and binding affinity prediction., *RNA Biology*, **8**, 988-  
873 996.
- 874 67. Zhao, H., Yang, Y. and Zhou, Y. (2011) Structure-based prediction of RNA-binding domains and  
875 RNA-binding sites and application to structural genomics targets., *Nucleic Acids Research*, **39**,  
876 3017-3025.
- 877 68. Zheng, J., *et al.* (2018) Deep-RBPPred: Predicting RNA binding proteins in the proteome scale  
878 based on deep learning., *Scientific Reports*, **8**.
- 879 69. Zhou, H. and Skolnick, J. (2011) GOAP: A Generalized Orientation-Dependent, All-Atom  
880 Statistical Potential for Protein Structure Prediction., *Biophys. J.* **101**, 2043-2052.
